# Supplementary material for: CD8 T cells and antibodies drive SARS-CoV-2 evolution in chronic infection
Source: Research Square preprint supplement (doi:10.21203/rs.3.rs-846197/v1), 2021-09-08
Supplement: Supplementary file 1 [file fd4c6c8d3bee9bf40dc68326.docx]

**Supplementary Material**

Table of contents

Methods pp. 2-5

Supplementary references pp. 5-6

Supplementary figures pp. 7-11

Supplementary tables pp. 12-35

**Methods**

**Study protocol and sample collection**

This patient was part of the COVID-19 Registry of the LMU University Hospital Munich (CORKUM, WHO trial id DRKS00021225). Written informed consent was obtained before any study related procedure. Clinical and routine laboratory data was prospectively collected within the COVID-19 registry and verified and complemented by individual chart review. Patient data was pseudonymized for analysis and the study was approved by the local ethics committees (No: 20-245). Healthy convalescent donors were recruited under ethical approval (No: 17-455) of LMU University Hospital Munich. All donors had acquired SARS-CoV-2 before November 2020 with a history of mild COVID-19 (WHO criteria). Respiratory samples for viral cultures and SARS-CoV-2 sequencing were obtained by endotracheal aspiration and naso-pharyngeal swabs. Heparinized whole blood was collected for preparation of peripheral blood monocytic cells (PBMCs) following standard procedures using Ficoll histopaque density centrifugation. PBMCs were stored in liquid nitrogen.

**Quantification of SARS-CoV-2 RNA from clinical specimen**

The following PCR assays were used for quantification in the accredited routine diagnostics laboratory of the Max von Pettenkofer Institute as previously described[1](https://www.zotero.org/google-docs/?qb9bOe): The nucleocapsid (N1) reaction (Center for Disease Control (CDC) protocol), and the Roche Cobas SARS-CoV-2 nucleocapsid reaction. For nucleic acid extraction, the Maxwell RSC Viral Total Nucleic Acid Purification Kit was used with the Maxwell RSC-48 device (Promega GmbH, Fitchburg, USA). Quantification was based on standard curves using serial dilutions of two reference samples from INSTAND e.V. with 106 and 107 RNA copies per ml in duplicate.

**Viral culture and molecular detection**

Vero E6 cells were inoculated at a dilution of 2:5 with an adsorption time of 1 hour at 37 °C. The inoculum was removed, fresh cell culture medium was added [Modified Eagle medium (MEM) supplemented with 2% fetal calf serum, 1x MEM Non Essential Amino Acids solution and 5x penicillin/streptomycin and Fungizone™, all from Invitrogen, Thermo Fisher Scientific, Darmstadt, Germany] and cells were examined for cytopathic effect (CPE) every 24 hours for 7 days. On day 0, when CPE was observed and, if no CPE was observed at the end of the cell culture incubation period, culture supernatants were collected and stored at -80 °C prior to nucleic acid extraction. Viral RNA was prepared from 140 µl of the cell culture supernatant stocks with the QIAamp Viral RNA Mini Kit (Qiagen, Hilden, Germany) and eluted in 80 µl RNase free H2O. SARS-CoV-2 RNA from viral cultures was detected by RT-PCR[2](https://www.zotero.org/google-docs/?Rj43Eb). Results of day 0 were compared to the results of the day when CPE was observed or of the end of the cell culture incubation period. The cell cultures were confirmed as positive if the CT-values of the RT-PCR was at least 3 CT-values lower compared to day 0. All cell cultures were performed within a class II cabinet in a biosafety laboratory level 3.

**Neutralisation test (NT)**

Neutralising antibody titres were determined as previously described[3](https://www.zotero.org/google-docs/?CztTdC). Neutralising activity of serum samples taken from the donors of convalescent plasma on the day of donation were tested against an early pandemic isolate (MUC IMB-1, GISAID accession number: EPI_ISL_406862) and expanded autologous patient isolates sampled on day 20 (DH206600, EPI_ISL_732538) and day 83 (DH209138, EPI_ISL_732531). Briefly, isolates were cultured in Vero E6 cells and NTs were performed in 96-well culture plates (Greiner bio-one, Frickenhausen, Germany). Virus stocks (50 TCID/50 µl) were prepared and stored at -80 °C until further use. Serum samples, including positive and negative control samples, were serially diluted in duplicates in Minimal Essential Medium (MEM, plus Non-Essential Amino Acids Solution and Antibiotic-Antimycotic Solution; all Invitrogen, Thermo Fisher Scientific, Darmstadt, Germany) starting at 1:5 to a maximum of 1:640. Diluted serum samples were pre-incubated with virus (1 h, 37 °C) before Vero E6 cells (1x104 cells/50 µl) were added to each well. After 72 hours of incubation at 37 °C (5%CO2) supernatants were discarded and the wells were fixed (13% formalin/PBS) and stained (0.1% crystal violet). The neutralising antibody titre corresponded to the reciprocal of the highest serum dilution showing complete inhibition of CPE. A virus retitration was performed in triplicate on each plate and exact titres were determined by retrograde calculation.

**NGS Sequencing of SARS-CoV-2**

The extracted RNA was translated into cDNA using the SuperScript IV First-Strand Synthesis System (Invitrogen, Thermo Fisher Scientific, Dreieich, Germany). After performing second strand synthesis (non-directional RNA second strand synthesis module NEBNext Ultra II, New England Biolabs, Frankfurt am Main, Germany), a library was generated using the Twist Library Preparation Kit (Twist Biosciences, San Francisco, CA, USA). Subsequently, a target enrichment step was added prior to sequencing on an Illumina MiSeq (Illumina Inc., Berlin, Germany). For this purpose, target enrichment baits that included SARS-CoV-2-specific sequences (Twist Respiratory Virus Research Panel, Twist BioSciences, San Francisco, CA, USA) were used according to the manufacturer's instructions. Captured libraries were sequenced using Sequencing V2 reagent chemistry with 2x150 cycles (Illumina Inc., Berlin, Germany). This approach was used for samples of days 20, 27, 33, 41, 50, 54, 62, 83, 97 and 154.

The samples of days 5, 61, 64, 68, 71, 78, 117, 127, 134, 141 and 152 were sequenced as amplicon pools generated from cDNA that was synthesized from isolated total RNA according to the ARTIC network nCoV-2019 sequencing protocol v2[4](https://www.zotero.org/google-docs/?2fVjlp). Amplicons were generated by two multiplex PCR reactions with ARTIC v3 primer pools (IDT, USA) pooled, diluted and quantified by Qubit DNA HS kit. Amplicon pools were diluted to 0.2 ng/µl and tagmented with nextera XT library prep kit (Illumina, USA). Nextera libraries were dual-barcoded and sequenced on an Illumina Hiseq 1500 instrument using V2 reagent chemistry and 2 x75 cycles.

**Sequence analysis pipeline**

Sequenced reads were demultiplexed and mapped against the SARS-CoV-2 reference

genome (NC_045512.2) with BWA-MEM. Variants were called using Freebayes with a ploidy

of 1[5](https://www.zotero.org/google-docs/?ahlAei). In addition, the effects of genetic variants on amino acid sequences were analyzed

with SnpEff[6](https://www.zotero.org/google-docs/?kVB1LO). Finally, the consensus sequences were created with the iVar package with

default settings using the generated pileup files from samtools[7,8](https://www.zotero.org/google-docs/?QaXpXk). Generated consensus

sequences were uploaded to the GISAID repository (Supplementary Table S1).

**Phylogenetic analysis and heatmap illustration**

The phylogenetic tree was obtained from a local Nextstrain installation using the supplied Snakemake workflow[9](https://www.zotero.org/google-docs/?psYJkw). Briefly, the workflow filters genomes based on pre-defined criteria, such as quality and lengths, aligns the genomes to the reference genome and constructs the phylogenetic tree, based on a maximum-likelihood approach. The sequences and metadata were downloaded from GISAID (accession date 09/06/2020) and subsampled to a maximum of 5 samples per country, year and month. The GISAID accession numbers of the used sequences are listed in Supplementary Table S5.

The mutation frequency heatmaps were generated with the variant frequencies obtained from Freebayes using the R package pheatmap[10](https://www.zotero.org/google-docs/?G3TkMh). Reported variants must show a minimal coverage of 10 reads and a variant frequency of at least 40% for coding variants in one of the samples.

**Structural analysis of mutated spike protein**

Protein coordinates were obtained from the Protein Data Bank (www.rcsb.org), using the following accession codes: 6XDG, 7L3N, 7C2L. Structural analysis and figure preparation were done with PyMOL (Schrödinger, Munich, Germany). Previously characterised exemplary monoclonal antibodies were used to illustrate the interaction with neutralising epitopes in the RBD and NTD[11–13](https://www.zotero.org/google-docs/?jIJeif).

**HLA Typing**

HLA class I typing was performed to 4-digit resolution by next-generation sequencing (Labor Dr. Klein and Dr. Rost, Martinsried and Laboratory for Immunogenetics, LMU Klinikum, Munich, Germany).

**HLA class I epitope candidates**

HLA class I epitope candidate peptides were identified by SAMBA, a simple anchor motif-based approach, considering all six of the patient’s classical HLA class I allotypes (HLA-A*01:01, A*02:01, B*08:01, B*35:01, C*04:01, C*07:01)[14](https://www.zotero.org/google-docs/?tlKF0J). The anchor motifs used in this analysis are presented in Supplementary Table S3. Eight- to 10-mer peptides representing candidate epitopes and 15-mer peptides encompassing candidate epitopes were synthesized by JPT, Berlin (Research Track Plus peptide libraries).

**Cell culture**

Standard medium for functional T-cell analyses (ELISPOT, IFN-γ release) and T-cell culture was RPMI 1640 with high glutamine (Gibco), supplemented with 7.5% fetal calf serum (Anprotec), penicillin (100 U, Gibco), streptomycin (100 μg/ml, Gibco), and sodium selenite (100 nM, ICN Biomedicals).

**ELISPOT analyses**

ELISPOT assays were performed with freshly purified PBMCs from patient and healthy convalescent donors. ELISPOT 96-well plates (PVDF membrane, Millipore MSIPN4510) were precoated overnight with an anti-IFN-γ antibody 1-D1K (15 μg/ml, Mabtech). Plates were washed, PBMCs were plated at 250,000 cells per well in standard medium, and peptide pools consisting of 15-amino acid peptides with 11 amino acids overlap fully covering SARS-CoV-2 antigens (Wuhan-Hu-1 strain; PepMix, JPT, Berlin) were added at 0.5 μg/ml per peptide to a total volume of 200 μl per well. Plates were incubated for 14–18 hours at 37 °C under 5% carbon dioxide. Cells were removed, and plates were incubated with biotinylated anti-IFN-γ antibody 7-B6-1 (1 μg/ml; Mabtech) and streptavidin-alkaline phosphatase (1 μg/ml; Mabtech) according to the manufacturer’s protocol. Spots were stained with AP conjugate kit (Bio-Rad) and counted in an automated ELISPOT counter (CTL).

**T-cell cultures and reactivity analyses**

SARS-CoV-2 peptide-stimulated T-cell cultures were set up in 24-well plates by plating cryopreserved, freshly thawed PBMCs from convalescent donors at 2.5 million PBMCs per ml of standard medium supplemented with interleukin-2 (10 U/ml, Proleukin S, Novartis), with addition of individual peptides or mixes of up to five peptides at 0.5 μg/ml per peptide, in a total volume of 2 ml per well. After 5±1, 10±2 and 15±2 days, cultures were maintained according to their visual appearance by either replacing half of the supernatant with fresh standard medium or by adding an equal volume of standard medium, in each case supplemented with interleukin-2 (100 U/ml). After 10 to 20 days, T-cell cultures were used in tests of their reactivity to titrated peptides or in tetramer staining.

For peptide reactivity analysis of peptide-stimulated T-cell cultures, T cells were thoroughly washed and incubated in 96-well culture plates in 3 or 4 replicates at 20.000 cells per well together with 10.000 CD40-stimulated B cells of appropriate HLA type and peptide in graded concentrations (from 0.0016 to 1 or 5 μg/ml in factor-5 steps) in standard medium (in a total of 200 μl/well)[15](https://www.zotero.org/google-docs/?aE1xFy). These co-cultures were incubated for 14 to 18 hours, supernatants were harvested, and concentrations of IFN-γ were determined in a standard ELISA assay (Mabtech).

**HLA-peptide tetramer staining and flow cytometry**

HLA-peptide tetramers were produced from HLA-A*01:01 or HLA-B*35:01 monomers (easYmer, ImmunAware) by incubation with peptide for two days at room temperature and subsequent tetramerization with streptavidin-PE (Becton-Dickinson), according to the manufacturer’s protocol. Cultured T cells or freshly thawn patient PBMCs were stained with tetramers at room temperature for 20 min, followed by staining with anti-CD8 Pacific Blue, anti-CD4 FITC (both Biolegend) and anti-CD3 A700 (BD Pharmingen) on ice for 20 min. Flow cytometry (FACS) was performed with a Becton-Dickinson Fortessa device, further data processing was done with FCSalyzer freeware (Sven Mostböck, Vienna).

Phenotypic FACS analysis was performed using fresh whole blood after lysis of erythrocytes. Activation markers on T cells were evaluated with a staining panel of anti-CD45 AF700 (Biolegend) and anti-CD3 APC-H7, anti-CD4 PerCP, anti-CD69 FITC, anti-CD38 PE, and anti-HLA-DR V500 (BD Biosciences). The BD Multitest™ 6-color TBNK reagent with BD Trucount™ tubes (BD Biosciences) was used to determine the absolute counts of cells. Flow cytometry measurements were performed on a CytoFLEX LX flow cytometer (Beckman-Coulter). Data were analyzed with FCSalyzer (Sven Mostböck, Vienna).

**References**

[1. Muenchhoff, M. *et al.* Multicentre comparison of quantitative PCR-based assays to detect SARS-CoV-2, Germany, March 2020. *Euro Surveill. Bull. Eur. Sur Mal. Transm. Eur. Commun. Dis. Bull.* **25**, (2020).](https://www.zotero.org/google-docs/?Fiht5R)

[2. Corman, V. M. *et al.* Detection of 2019 novel coronavirus (2019-nCoV) by real-time RT-PCR. *Euro Surveill. Bull. Eur. Sur Mal. Transm. Eur. Commun. Dis. Bull.* **25**, (2020).](https://www.zotero.org/google-docs/?Fiht5R)

[3. Haselmann, V. *et al.* Results of the first pilot external quality assessment (EQA) scheme for anti-SARS-CoV2-antibody testing. *Clin. Chem. Lab. Med. CCLM* **58**, 2121–2130 (2020).](https://www.zotero.org/google-docs/?Fiht5R)

[4. Quick, J. nCoV-2019 sequencing protocol v2 (GunIt) v2. doi:10.17504/protocols.io.bdp7i5rn.](https://www.zotero.org/google-docs/?Fiht5R)

[5. Garrison, E. & Marth, G. Haplotype-based variant detection from short-read sequencing. *ArXiv12073907 Q-Bio* (2012).](https://www.zotero.org/google-docs/?Fiht5R)

[6. Cingolani, P. *et al.* A program for annotating and predicting the effects of single nucleotide polymorphisms, SnpEff: SNPs in the genome of Drosophila melanogaster strain w1118; iso-2; iso-3. *Fly (Austin)* **6**, 80–92 (2012).](https://www.zotero.org/google-docs/?Fiht5R)

[7. Grubaugh, N. D. *et al.* An amplicon-based sequencing framework for accurately measuring intrahost virus diversity using PrimalSeq and iVar. *Genome Biol.* **20**, 8 (2019).](https://www.zotero.org/google-docs/?Fiht5R)

[8. Li, H. *et al.* The Sequence Alignment/Map format and SAMtools. *Bioinforma. Oxf. Engl.* **25**, 2078–2079 (2009).](https://www.zotero.org/google-docs/?Fiht5R)

[9. Hadfield, J. *et al.* Nextstrain: real-time tracking of pathogen evolution. *Bioinforma. Oxf. Engl.* **34**, 4121–4123 (2018).](https://www.zotero.org/google-docs/?Fiht5R)

[10. Kolde, R. *pheatmap: Pretty Heatmaps*. (2019).](https://www.zotero.org/google-docs/?Fiht5R)

[11. Jones, B. E. *et al. LY-CoV555, a rapidly isolated potent neutralizing antibody, provides protection in a non-human primate model of SARS-CoV-2 infection*. http://biorxiv.org/lookup/doi/10.1101/2020.09.30.318972 (2020) doi:10.1101/2020.09.30.318972.](https://www.zotero.org/google-docs/?Fiht5R)

[12. Chi, X. *et al.* A neutralizing human antibody binds to the N-terminal domain of the Spike protein of SARS-CoV-2. *Science* **369**, 650–655 (2020).](https://www.zotero.org/google-docs/?Fiht5R)

[13. Hansen, J. *et al.* Studies in humanized mice and convalescent humans yield a SARS-CoV-2 antibody cocktail. *Science* **369**, 1010–1014 (2020).](https://www.zotero.org/google-docs/?Fiht5R)

[14. Martin, L. K. *et al.* Cross-sectional analysis of CD8 T cell immunity to human herpesvirus 6B. *PLoS Pathog.* **14**, e1006991 (2018).](https://www.zotero.org/google-docs/?Fiht5R)

[15. Wiesner, M. *et al.* Conditional Immortalization of Human B Cells by CD40 Ligation. *PLoS ONE* **3**, e1464 (2008).](https://www.zotero.org/google-docs/?Fiht5R)

**Supplementary Figures**

**Fig. 1:** Longitudinal viral load results.

SARS-CoV-2 RNA copy numbers per ml of endotracheal aspirates and serum are shown over time. Days are indicated in relation to the first positive SARS-CoV-2 RNA result (day 0).


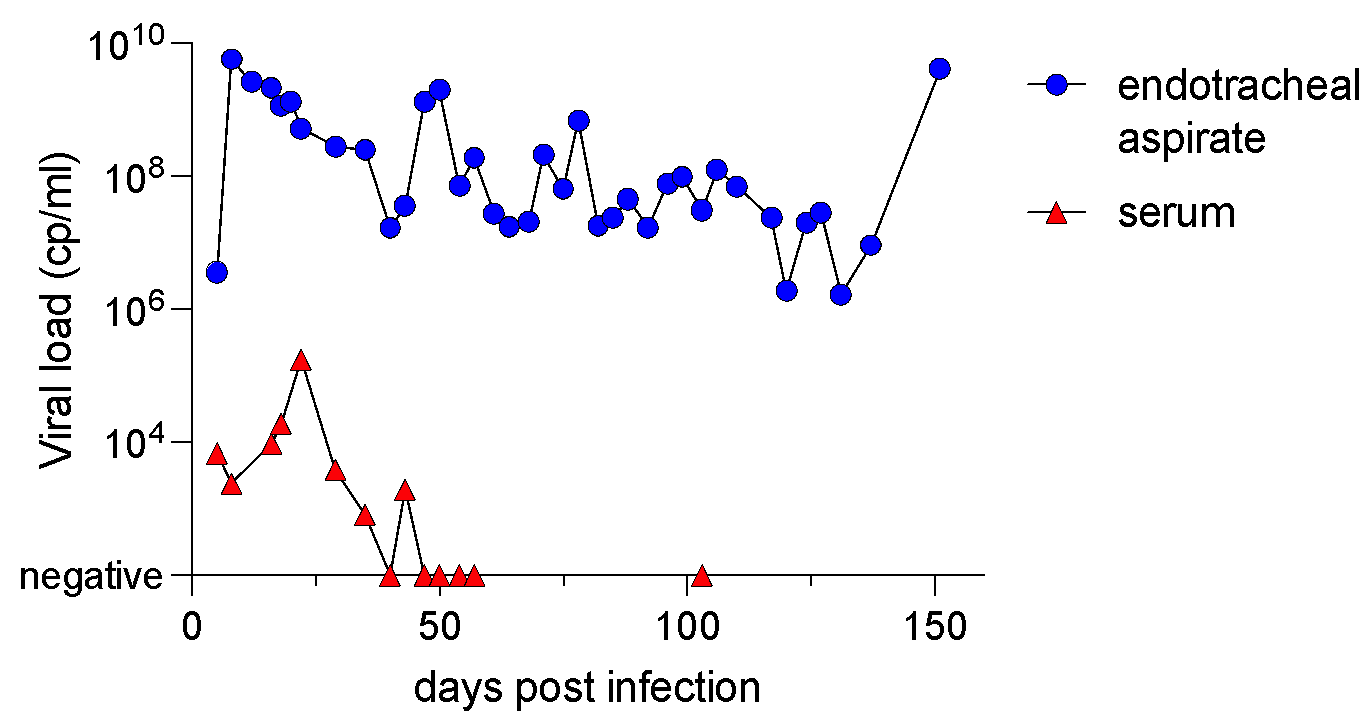


**Fig. 2:** Phylogenetic tree of patient and global SARS-CoV-2 sequences.

Maximum likelihood phylogenetic tree of the 21 whole genome SARS-CoV-2 sequences derived from the patient in this study (red) along with representative global sequences sampled between December 2019 and June 2020 (blue) in comparison to the reference genome Wuhan-Hu-1 (orange). A full list of global sequences used in this analysis is given in Table S5. The x-axis represents the genetic distance as one nucleotide substitution in relation to the reference genome.

**
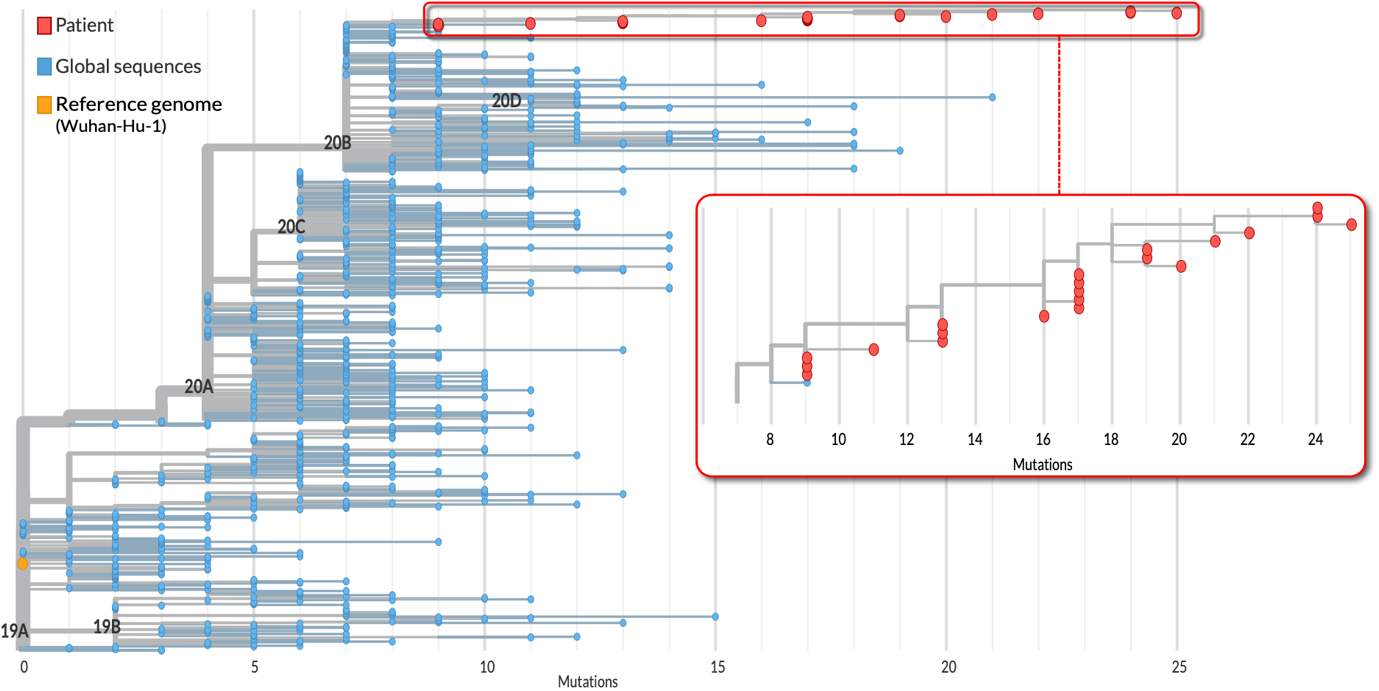
**

**Fig. 3:** Longitudinal SARS-CoV-2 sequence analysis.

The heatmap shows the frequencies of mutations in coding regions for the 21 sequences of the patient in this study. Nucleotide and amino acid substitutions are indicated relative to the reference strain Wuhan-Hu-1. Six coding mutations were already present in the first sample at day 5, therefore likely representing the transmitted strain.

**
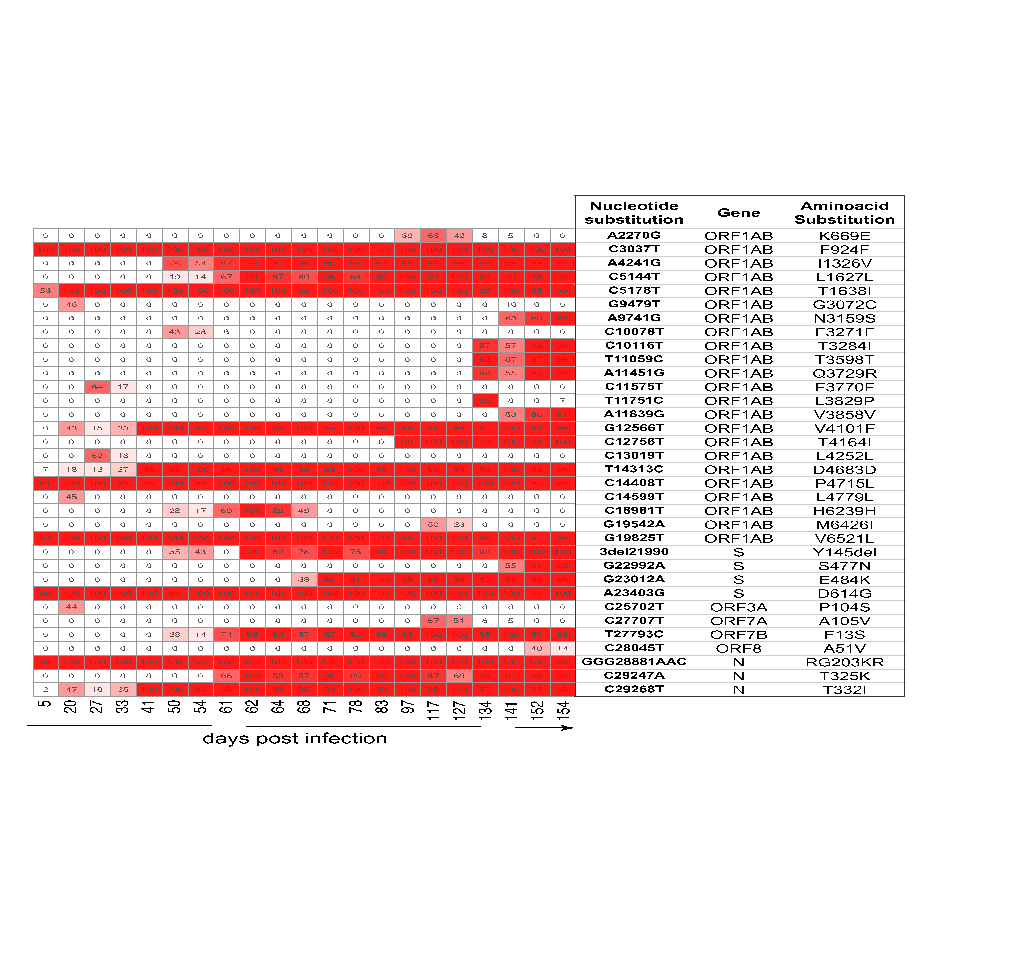
**

**Fig. 4:** Reactivity of T cells to original and mutant epitope peptides.

T-cell cultures were prepared from donor 3 by stimulation and expansion with the HLA-A*01:01-restricted epitope peptides CTDDNALAY(Y). Their reactivity to these epitopes and their mutant variants CIDDNALAY(Y) was tested by overnight co-culture with HLA-matched activated B cells and peptides at the indicated concentrations. Supernatants were harvested, and IFN-γ concentrations were determined by ELISA.

**
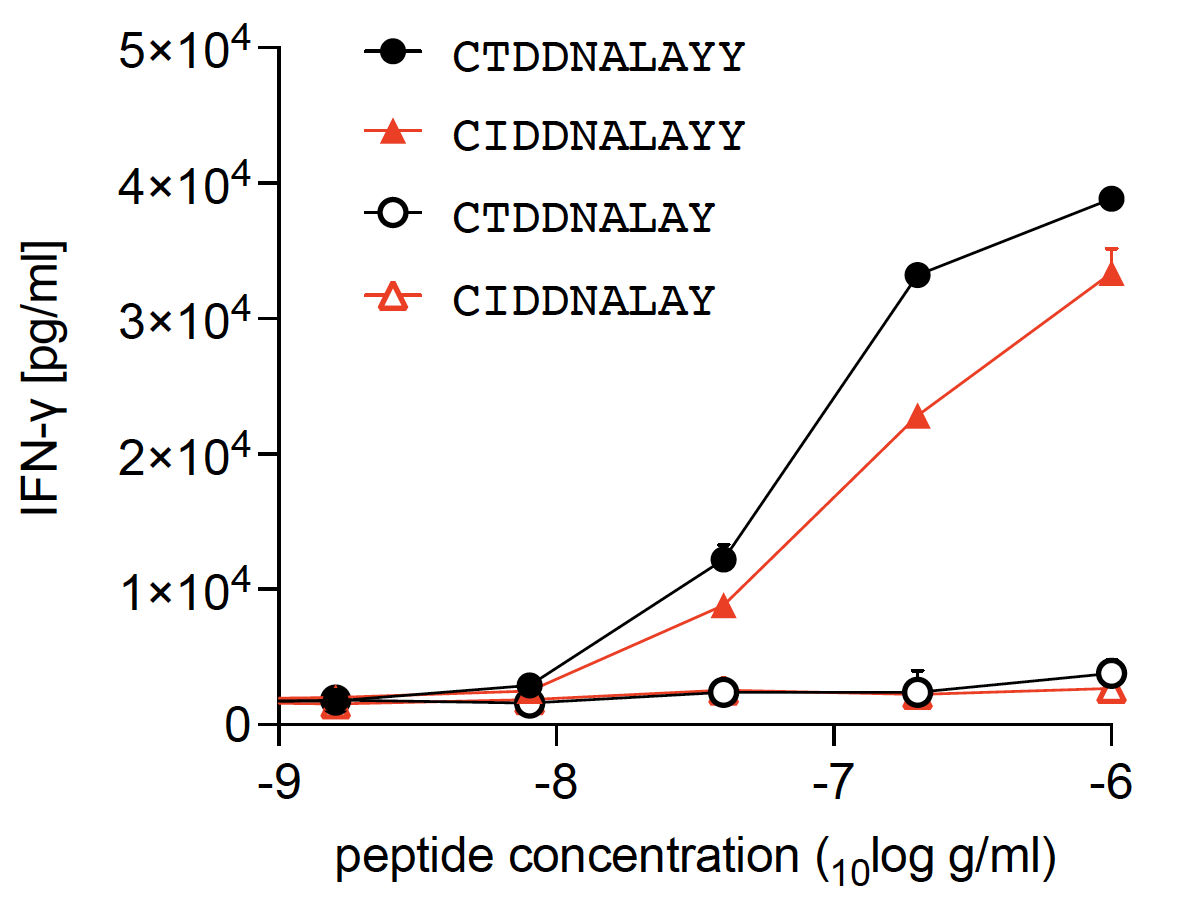
**

**Fig. 5:** HLA/peptide tetramer analysis of T-cell cultures.

T-cell cultures from donor 1 (top) or donor 2 (bottom) were stained with HLA-B*35:01 tetramers loaded with peptide TPSGTWLTY and its two mutant versions (top) or with HLA-A*01:01 tetramers loaded with CTDDNALAY(Y) and their mutant versions (bottom).

**
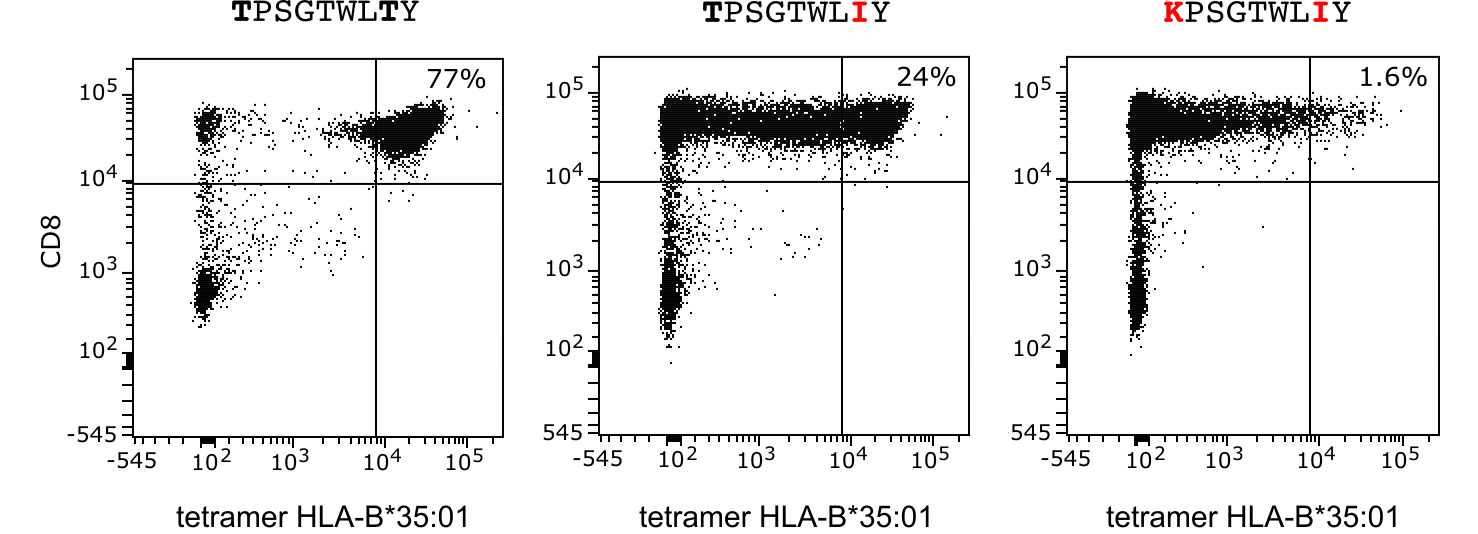
**


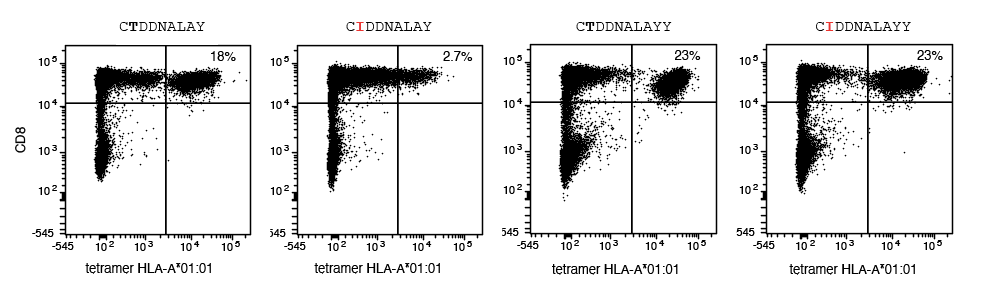


**Supplementary Tables**

**Table 1:** Summary of sequence metadata with GISAID (<https://www.gisaid.org>) accession numbers.

| **Sample ID** | **Collection date** | **days after infection** | **mean coverage** | **coverage** | **GISAID ID** |
| --- | --- | --- | --- | --- | --- |
| V2025779 | 11/05/2020 | 5 | 405 | 99.92 | EPI_ISL_466909 |
| DH206600 | 26/05/2020 | 20 | 1125 | 99.92 | EPI_ISL_732538 |
| DH206861 | 02/06/2020 | 27 | 1168 | 99.91 | EPI_ISL_732539 |
| DH207324 | 08/06/2020 | 33 | 602 | 99.89 | EPI_ISL_732540 |
| DH207597 | 16/06/2020 | 41 | 764 | 99.91 | EPI_ISL_732537 |
| DH207884 | 25/06/2020 | 50 | 410 | 99.92 | EPI_ISL_732535 |
| DH207990 | 29/06/2020 | 54 | 160 | 99.84 | EPI_ISL_732536 |
| V2074236 | 06/07/2020 | 61 | 814 | 98.86 | EPI_ISL_1751601 |
| DH208291 | 07/07/2020 | 62 | 307 | 99.8 | EPI_ISL_732534 |
| V2074567 | 09/07/2020 | 64 | 1320 | 98.96 | EPI_ISL_1751602 |
| V2074895 | 13/07/2020 | 68 | 1833 | 98.39 | EPI_ISL_1751603 |
| V2075248 | 16/07/2020 | 71 | 1745 | 98.98 | EPI_ISL_1751604 |
| V2075789 | 23/07/2020 | 78 | 1822 | 98.16 | EPI_ISL_1751605 |
| DH209138 | 28/07/2020 | 83 | 767 | 99.92 | EPI_ISL_732531 |
| DH209442 | 11/08/2020 | 97 | 1479 | 99.91 | EPI_ISL_732532 |
| V2080672 | 31/08/2020 | 117 | 1840 | 98.95 | EPI_ISL_1751606 |
| V2082641 | 10/09/2020 | 127 | 1920 | 96.91 | EPI_ISL_1751607 |
| V2083593 | 17/09/2020 | 134 | 1759 | 98.49 | EPI_ISL_1751608 |
| V2085389 | 24/09/2020 | 141 | 1834 | 98.17 | EPI_ISL_1751611 |
| V2088212 | 05/10/2020 | 152 | 956 | 98.67 | EPI_ISL_1751623 |
| DH211525 | 07/10/2020 | 154 | 3226 | 99.88 | EPI_ISL_732658 |

**Table 2.** HLA class I type of the patient and five immunocompetent convalescent donors (HD).

|  |  |  |  |  |  |  |
| --- | --- | --- | --- | --- | --- | --- |
|  | HLA-A |  | HLA-B |  | HLA-C |  |
| Patient | A*01:01:01 | A*02:01:01 | B*08:01:01 | B*35:01:01 | C*04:01:01 | C*07:01:01 |
| HD1 | A*03:01:01 | A*32:01:01 | B*15:01:01 | B*35:01:01 | C*03:03:01 | C*04:01:01 |
| HD2 | A*01:01:01G | A*02:01:01G | B*08:01:01G | B*13:10 | C*06:02:01G | C*07:01:01G |
| HD3 | A*01:01:01G | A*24:02:01G | B*49:01:01G | B*55:01:01G | C*03:03:01G | C*07:01:01G |
| HD4 | A*02:01:01G | A*11:01:01G | B*35:01:01G, | B*44:02:01G | C*04:01:01G | C*05:01:01G |
| HD5 | A*02:01:01G | – | B*51:01:01G | – | C*14:02:01G | – |

**Table 3.** Anchor motifs used for epitope candidate identification for HLA class I allotypes of the patient.

| HLA allotype | anchor motif |  |
| --- | --- | --- |
| A*01:01 | X(ST)(DE)X5-7Y |  |
| A*02:01 | X(LIMv)X6-7(LVIM) |  |
| B*08:01 | XX(RK)X(RK)X2-3(LVIM) | |
| B*35:01 | XPX5-8(YFLVIM) |  |
| C*04:01 | X(FYWX)(De)X4-6(LFMivyw) | |
| C*07:01 | (KRx)(Rt)X5-7(LFYMivw) | |

Notes:

The one-letter amino acid code in uppercase or lowercase is used.

X indicates any amino acid.

Amino acids in brackets are alternatives; thus, (ST) indicates S or T.

X2-3 indicates XX or XXX.

Uppercase indicates most preferred amino acids, lowercase less preferred amino acids. A maximum of one less preferred anchor residue was admissible for an epitope candidate.

**Table 4.** Epitope candidates with sequence alterations by fixed SARS-CoV-2 mutations for all HLA class I alleles of the patient.

| nt | aa ch. | day | protein | epitope candidates, HLA class I | | | |
| --- | --- | --- | --- | --- | --- | --- | --- |
|  |  |  |  | A*01:01 | A*02:01 | B*35:01 | C*04:01 |
|  |  |  |  |  |  |  |  |
| 4241 | I1326V | 50 | nsp3 | PTDNY**I**TTY | n | VPTDNY**I**TTY | PTDNY**I**TTY |
| 9741 | N3159S | 141 | nsp4 | n | n | n | n |
| 10116 | T3284I | 134 | 3CLpro | n | QV**T**CGTTTL | n | n |
| 11451 | Q3729R | 134 | nsp6 | n | n | n | n |
| 12566 | V4101F | 41 | nsp8 | n | ALWEIQQ**V**V | n | n |
| 12756 | T4164I | 97 | nsp9 | C**T**DDNALAY | n | n | C**T**DDNALAY |
|  |  |  |  | C**T**DDNALAYY |  |  | C**T**DDNALAYY |
| 21990 | del144 | 62 | spike | n | n | DPFLGV**Y**Y | n |
| 22992 | S477N | 141 | spike | n | n | n | n |
| 23012 | E484K | 71 | spike | n | n | TPCNGV**E**GF | n |
| 27793 | F13S | 61 | ORF7b | n | YLC**F**LAFLL | n | n |
|  |  |  |  |  | **F**LAFLLFLV |  |  |
|  |  |  |  |  | **F**LAFLLFLVL |  |  |
| 29247 | T325K | 61 | nucleopr. | n | EV**T**PSGTWL | **T**PSGTWLIY | n |
| 29268 | T332I | 41 | nucleopr. | n | WL**T**YTGAIKL | TPSGTWL**T**Y | n |

Notes:

nt, nucleotide position of mutation; aa ch., amino acid change (exchange or deletion); day, day when mutation became dominant (>50% of sequencing reads); n, none identified. No epitope candidates were identified for the alleles HLA-B*08:01 and HLA-C*07:01.

Pre-mutation peptide sequences are shown, sites of amino acid exchanges or deletion are underlined.

**Table 5:** GISAID (<https://www.gisaid.org>) accession numbers for the global sequences shown in the phylogenetic tree in Fig. S2.

We gratefully acknowledge the following authors from the originating laboratories responsible for obtaining the specimens and the submitting laboratories, where genetic sequence data were generated and shared via the GISAID Initiative, on which this research is based.

| **Virus name** | **Accession No.** | **Collected** |
| --- | --- | --- |
| Algeria/G0638_2264/2020 | EPI_ISL_418241 | 2020-03-02 |
| Algeria/G0640_2265/2020 | EPI_ISL_418242 | 2020-03-08 |
| Algeria/G0860_2262/2020 | EPI_ISL_420037 | 2020-03-02 |
| Argentina/C1374/2020 | EPI_ISL_420599 | 2020-03-18 |
| Argentina/PAIS_A006/2020 | EPI_ISL_430798 | 2020-03-28 |
| Argentina/PAIS_A009/2020 | EPI_ISL_430801 | 2020-03-31 |
| Argentina/PAIS_A013/2020 | EPI_ISL_430804 | 2020-04-01 |
| Argentina/PAIS_A016/2020 | EPI_ISL_430807 | 2020-04-02 |
| Argentina/PAIS_A018/2020 | EPI_ISL_430809 | 2020-04-04 |
| Argentina/PAIS_A020/2020 | EPI_ISL_430811 | 2020-04-11 |
| Argentina/PAIS_A027/2020 | EPI_ISL_430818 | 2020-04-19 |
| Australia/NSW01/2020 | EPI_ISL_407893 | 2020-01-24 |
| Australia/NSW04/2020 | EPI_ISL_417030 | 2020-01-24 |
| Australia/NSW05/2020 | EPI_ISL_412975 | 2020-02-28 |
| Australia/NSW06/2020 | EPI_ISL_413213 | 2020-02-29 |
| Australia/NT01/2020 | EPI_ISL_419831 | 2020-02-21 |
| Australia/QLD01/2020 | EPI_ISL_407894 | 2020-01-28 |
| Australia/SAP126/2020 | EPI_ISL_451135 | 2020-03-21 |
| Australia/VIC01/2020 | EPI_ISL_406844 | 2020-01-25 |
| Australia/VIC02/2020 | EPI_ISL_416410 | 2020-01-24 |
| Australia/VIC03/2020 | EPI_ISL_416411 | 2020-01-25 |
| Australia/VIC1081/2020 | EPI_ISL_430580 | 2020-04-06 |
| Australia/VIC1105/2020 | EPI_ISL_430586 | 2020-04-07 |
| Australia/VIC1157/2020 | EPI_ISL_430598 | 2020-04-09 |
| Australia/VIC1247/2020 | EPI_ISL_436113 | 2020-04-09 |
| Australia/VIC1510/2020 | EPI_ISL_456475 | 2020-05-01 |
| Australia/VIC1513/2020 | EPI_ISL_456477 | 2020-05-02 |
| Australia/VIC1558/2020 | EPI_ISL_456481 | 2020-05-03 |
| Australia/VIC1611/2020 | EPI_ISL_456521 | 2020-05-09 |
| Australia/VIC1641/2020 | EPI_ISL_456544 | 2020-05-02 |
| Australia/VIC1655/2020 | EPI_ISL_456557 | 2020-05-02 |
| Australia/VIC215/2020 | EPI_ISL_419910 | 2020-03-20 |
| Australia/VIC326/2020 | EPI_ISL_420017 | 2020-03-24 |
| Australia/VIC604/2020 | EPI_ISL_426859 | 2020-03-26 |
| Australia/VIC718/2020 | EPI_ISL_427002 | 2020-03-27 |
| Australia/VPRL014/2020 | EPI_ISL_455603 | 2020-01-30 |
| Austria/CeMM0002/2020 | EPI_ISL_419655 | 2020-02-26 |
| Austria/CeMM0023/2020 | EPI_ISL_437913 | 2020-03-09 |
| Austria/CeMM0043/2020 | EPI_ISL_437931 | 2020-03-09 |
| Austria/CeMM0045/2020 | EPI_ISL_437932 | 2020-02-24 |
| Austria/CeMM0067/2020 | EPI_ISL_437939 | 2020-04-06 |
| Austria/CeMM0125/2020 | EPI_ISL_437981 | 2020-03-11 |
| Austria/CeMM0147/2020 | EPI_ISL_437995 | 2020-02-28 |
| Austria/CeMM0217/2020 | EPI_ISL_438051 | 2020-03-16 |
| Austria/CeMM0243/2020 | EPI_ISL_438073 | 2020-03-20 |
| Austria/Graz-MUG11/2020 | EPI_ISL_437300 | 2020-04-14 |
| Austria/Graz-MUG15/2020 | EPI_ISL_437301 | 2020-04-17 |
| Austria/Graz-MUG7/2020 | EPI_ISL_437203 | 2020-04-06 |
| Austria/Graz-MUG9/2020 | EPI_ISL_437299 | 2020-04-09 |
| Bangladesh/Akbiomed_01/2020 | EPI_ISL_445244 | 2020-04-25 |
| Bangladesh/BARJ_CVASU_CTG_506/2020 | EPI_ISL_450342 | 2020-05-08 |
| Bangladesh/BCSIR_NILMRC_002/2020 | EPI_ISL_462091 | 2020-05-23 |
| Bangladesh/CHRF_0001/2020 | EPI_ISL_437912 | 2020-04-18 |
| Bangladesh/DNAS_CPH_427/2020 | EPI_ISL_445215 | 2020-04-28 |
| Bangladesh/DNAS_CPH_466/2020 | EPI_ISL_445216 | 2020-04-28 |
| Bangladesh/DNAS_CPH_467/2020 | EPI_ISL_445213 | 2020-04-28 |
| Bangladesh/DNAS_CPH_471/2020 | EPI_ISL_445214 | 2020-04-28 |
| Bangladesh/DU_50740/2020 | EPI_ISL_450839 | 2020-05-06 |
| Bangladesh/DU_50768/2020 | EPI_ISL_450843 | 2020-05-06 |
| Bangladesh/DU_CARS_5586/2020 | EPI_ISL_450841 | 2020-05-13 |
| Belgium/AO-04074040/2020 | EPI_ISL_462258 | 2020-04-07 |
| Belgium/BA-02291/2020 | EPI_ISL_415159 | 2020-02-29 |
| Belgium/DMM-0325180/2020 | EPI_ISL_420437 | 2020-03-25 |
| Belgium/GE-0317105/2020 | EPI_ISL_420361 | 2020-03-17 |
| Belgium/GHB-03021/2020 | EPI_ISL_407976 | 2020-02-03 |
| Belgium/ITM_C451/2020 | EPI_ISL_434377 | 2020-04-12 |
| Belgium/SG-0507420/2020 | EPI_ISL_462274 | 2020-05-07 |
| Belgium/SN-0331360/2020 | EPI_ISL_462214 | 2020-03-31 |
| Belgium/UGent-62/2020 | EPI_ISL_451173 | 2020-04-05 |
| Belgium/ULG-10063/2020 | EPI_ISL_424665 | 2020-04-05 |
| Belgium/ULG-10081/2020 | EPI_ISL_424640 | 2020-04-03 |
| Belgium/ULG-10170/2020 | EPI_ISL_455958 | 2020-05-11 |
| Belgium/ULG-10180/2020 | EPI_ISL_455968 | 2020-05-09 |
| Belgium/ULG-10191/2020 | EPI_ISL_455979 | 2020-05-11 |
| Belgium/ULG-8595/2020 | EPI_ISL_418634 | 2020-03-19 |
| Belgium/VGM-0402374/2020 | EPI_ISL_462228 | 2020-04-02 |
| Bosnia-and-Herzegovina/01-Livno/2020 | EPI_ISL_462753 | 2020-05-27 |
| Bosnia-and-Herzegovina/ChVir7348/2020 | EPI_ISL_462455 | 2020-03-20 |
| Bosnia-and-Herzegovina/ChVir7350/2020 | EPI_ISL_462457 | 2020-03-20 |
| Bosnia-and-Herzegovina/ChVir7362/2020 | EPI_ISL_462465 | 2020-03-25 |
| Bosnia-and-Herzegovina/ChVir7365/2020 | EPI_ISL_462467 | 2020-03-26 |
| Bosnia-and-Herzegovina/ChVir7377/2020 | EPI_ISL_462475 | 2020-03-30 |
| Bosnia-and-Herzegovina/ChVir7382/2020 | EPI_ISL_462472 | 2020-04-01 |
| Bosnia-and-Herzegovina/ChVir7387/2020 | EPI_ISL_462461 | 2020-04-11 |
| Bosnia-and-Herzegovina/ChVir7396/2020 | EPI_ISL_462466 | 2020-04-21 |
| Bosnia-and-Herzegovina/ChVir7402/2020 | EPI_ISL_462470 | 2020-04-22 |
| Brazil/AMBR-02/2020 | EPI_ISL_417034 | 2020-03-16 |
| Brazil/AP164346-IEC/2020 | EPI_ISL_458145 | 2020-04-20 |
| Brazil/CV21/2020 | EPI_ISL_429681 | 2020-03-16 |
| Brazil/DF-891/2020 | EPI_ISL_427298 | 2020-03-22 |
| Brazil/ES-225/2020 | EPI_ISL_415128 | 2020-02-29 |
| Brazil/RJ-1058/2020 | EPI_ISL_456073 | 2020-04-01 |
| Brazil/RJ-2062/2020 | EPI_ISL_456103 | 2020-04-16 |
| Brazil/RJ-314/2020 | EPI_ISL_414045 | 2020-03-04 |
| Brazil/SC-769/2020 | EPI_ISL_427306 | 2020-03-10 |
| Brazil/SPBR-01/2020 | EPI_ISL_412964 | 2020-02-25 |
| Brazil/SPBR-02/2020 | EPI_ISL_413016 | 2020-02-28 |
| Brazil/SPBR-05/2020 | EPI_ISL_414016 | 2020-02-29 |
| Brazil/SPBR-12/2020 | EPI_ISL_416034 | 2020-03-04 |
| Brunei/1/2020 | EPI_ISL_443187 | 2020-03-11 |
| Brunei/2/2020 | EPI_ISL_435674 | 2020-03-11 |
| Brunei/3/2020 | EPI_ISL_435675 | 2020-03-11 |
| Brunei/4/2020 | EPI_ISL_435676 | 2020-03-21 |
| Brunei/5/2020 | EPI_ISL_435677 | 2020-03-21 |
| Cambodia/0012/2020 | EPI_ISL_411902 | 2020-01-27 |
| Canada/BC_17397/2020 | EPI_ISL_415580 | 2020-02-28 |
| Canada/BC_37_0-2/2020 | EPI_ISL_412965 | 2020-02-16 |
| Canada/BC_6502001/2020 | EPI_ISL_418840 | 2020-03-12 |
| Canada/BC_69243/2020 | EPI_ISL_415577 | 2020-02-20 |
| Canada/ON_ON-VIDO-01-2/2020 | EPI_ISL_425177 | 2020-01-23 |
| Canada/ON_PHL2445/2020 | EPI_ISL_413014 | 2020-01-25 |
| Canada/ON_PHL3917/2020 | EPI_ISL_418322 | 2020-03-08 |
| Canada/ON_PHL4181/2020 | EPI_ISL_418327 | 2020-01-25 |
| Canada/ON_PHL5472/2020 | EPI_ISL_418325 | 2020-02-20 |
| Canada/ON_SHSC-01/2020 | EPI_ISL_450747 | 2020-02-26 |
| Canada/ON_VIDO-01/2020 | EPI_ISL_413015 | 2020-01-23 |
| Canada/QC_AC3/2020 | EPI_ISL_444507 | 2020-04-06 |
| Canada/QC_AC7/2020 | EPI_ISL_444510 | 2020-04-06 |
| Canada/QC-AJ2/2020 | EPI_ISL_450638 | 2020-04-08 |
| Canada/Qc-L00240857/2020 | EPI_ISL_450306 | 2020-03-27 |
| Canada/Qc-L00241355/2020 | EPI_ISL_450318 | 2020-03-27 |
| canine/HongKong/20-03695/2020 | EPI_ISL_450403 | 2020-03-18 |
| Chile/Punta_Arenas_11/2020 | EPI_ISL_445292 | 2020-03-22 |
| Chile/Punta_Arenas_7/2020 | EPI_ISL_445288 | 2020-03-20 |
| Chile/Punta_Arenas_9/2020 | EPI_ISL_445290 | 2020-03-21 |
| Chile/Santiago_12/2020 | EPI_ISL_445255 | 2020-03-10 |
| Chile/Santiago_18/2020 | EPI_ISL_445261 | 2020-03-11 |
| Chile/Santiago_26/2020 | EPI_ISL_445305 | 2020-03-16 |
| Chile/Santiago_35/2020 | EPI_ISL_445314 | 2020-03-17 |
| Chile/Santiago_52/2020 | EPI_ISL_445349 | 2020-04-01 |
| Chile/Santiago_54/2020 | EPI_ISL_445350 | 2020-04-01 |
| Chile/Santiago_55/2020 | EPI_ISL_445351 | 2020-04-02 |
| Chile/Santiago_6/2020 | EPI_ISL_445249 | 2020-03-09 |
| Chile/Santiago_74/2020 | EPI_ISL_445370 | 2020-04-05 |
| Chile/Santiago_76/2020 | EPI_ISL_445373 | 2020-04-03 |
| Chile/Santiago_77/2020 | EPI_ISL_445374 | 2020-04-04 |
| Chile/Santiago_78/2020 | EPI_ISL_445375 | 2020-04-04 |
| Chile/Santiago_80/2020 | EPI_ISL_445377 | 2020-04-05 |
| Chile/Temuco_14/2020 | EPI_ISL_445348 | 2020-03-25 |
| Chile/Temuco_5/2020 | EPI_ISL_445340 | 2020-03-25 |
| Colombia/GUV-92252/2020 | EPI_ISL_447767 | 2020-04-01 |
| Colombia/GVI-92161/2020 | EPI_ISL_447763 | 2020-03-31 |
| Colombia/GVI-93301/2020 | EPI_ISL_447769 | 2020-04-01 |
| Colombia/GVI-93476/2020 | EPI_ISL_447782 | 2020-04-02 |
| Colombia/GVI-93538/2020 | EPI_ISL_447790 | 2020-04-03 |
| Colombia/GVI-97181/2020 | EPI_ISL_447792 | 2020-04-03 |
| Colombia/GVI-97203/2020 | EPI_ISL_447793 | 2020-04-03 |
| Colombia/GVI-97795/2020 | EPI_ISL_447805 | 2020-04-04 |
| Colombia/GVI97517/2020 | EPI_ISL_447816 | 2020-04-07 |
| Colombia/INS-79743/2020 | EPI_ISL_456145 | 2020-03-14 |
| Colombia/INS-79890/2020 | EPI_ISL_456148 | 2020-03-16 |
| Colombia/INS-80656/2020 | EPI_ISL_456126 | 2020-03-18 |
| Colombia/INS-81264/2020 | EPI_ISL_456140 | 2020-03-10 |
| CostaRica/02/2020 | EPI_ISL_434535 | 2020-03-16 |
| CostaRica/CV-0007/2020 | EPI_ISL_458236 | 2020-03-06 |
| Croatia/1146_Split/2020 | EPI_ISL_454581 | 2020-03-18 |
| Croatia/14412_Koprivnica/2020 | EPI_ISL_454602 | 2020-04-21 |
| Croatia/17-S7new/2020 | EPI_ISL_455566 | 2020-03-30 |
| Croatia/361_Pula/2020 | EPI_ISL_454595 | 2020-03-09 |
| Croatia/8U-S17new/2020 | EPI_ISL_454605 | 2020-03-31 |
| Croatia/I7-S21new/2020 | EPI_ISL_454606 | 2020-03-30 |
| Croatia/OY-S1new/2020 | EPI_ISL_454574 | 2020-04-09 |
| CzechRepublic/2308/2020 | EPI_ISL_434572 | 2020-04-14 |
| CzechRepublic/IAB_1/2020 | EPI_ISL_426883 | 2020-03-27 |
| CzechRepublic/IAB_14/2020 | EPI_ISL_426889 | 2020-04-02 |
| CzechRepublic/IAB_17/2020 | EPI_ISL_426892 | 2020-03-27 |
| CzechRepublic/IAB_21/2020 | EPI_ISL_426895 | 2020-03-27 |
| CzechRepublic/IAB_8/2020 | EPI_ISL_426885 | 2020-03-27 |
| CzechRepublic/IAB_9/2020 | EPI_ISL_426886 | 2020-03-28 |
| CzechRepublic/NRL_2615/2020 | EPI_ISL_437519 | 2020-03-16 |
| CzechRepublic/Seq3/2020 | EPI_ISL_426356 | 2020-03-21 |
| CzechRepublic/Seq6/2020 | EPI_ISL_426359 | 2020-03-17 |
| Denmark/ALAB-HH-126/2020 | EPI_ISL_452007 | 2020-03-11 |
| Denmark/ALAB-HH-173/2020 | EPI_ISL_452042 | 2020-04-14 |
| Denmark/ALAB-HH-183/2020 | EPI_ISL_452049 | 2020-04-14 |
| Denmark/ALAB-HH-233/2020 | EPI_ISL_452077 | 2020-04-28 |
| Denmark/ALAB-HH-255/2020 | EPI_ISL_452091 | 2020-04-26 |
| Denmark/ALAB-HH-266/2020 | EPI_ISL_452097 | 2020-05-09 |
| Denmark/ALAB-HH-267/2020 | EPI_ISL_452098 | 2020-05-09 |
| Denmark/ALAB-SSI-1391/2020 | EPI_ISL_444856 | 2020-04-04 |
| Denmark/ALAB-SSI-1498/2020 | EPI_ISL_437656 | 2020-04-03 |
| Denmark/ALAB-SSI-621/2020 | EPI_ISL_437002 | 2020-03-24 |
| Denmark/ALAB-SSI-692/2020 | EPI_ISL_437042 | 2020-03-27 |
| Denmark/ALAB-SSI-860/2020 | EPI_ISL_444945 | 2020-03-27 |
| Denmark/SSI-01/2020 | EPI_ISL_416142 | 2020-02-26 |
| Denmark/SSI-02/2020 | EPI_ISL_416143 | 2020-02-28 |
| DRC/1376/2020 | EPI_ISL_431012 | 2020-04-07 |
| DRC/191/2020 | EPI_ISL_417955 | 2020-03-21 |
| DRC/1952/2020 | EPI_ISL_435159 | 2020-04-11 |
| DRC/1982/2020 | EPI_ISL_435160 | 2020-04-12 |
| DRC/214/2020 | EPI_ISL_420030 | 2020-03-21 |
| DRC/243/2020 | EPI_ISL_420034 | 2020-03-22 |
| DRC/2942/2020 | EPI_ISL_437355 | 2020-04-17 |
| DRC/299/2020 | EPI_ISL_420840 | 2020-03-20 |
| DRC/3791/2020 | EPI_ISL_447242 | 2020-04-24 |
| Ecuador/HEE-01/2020 | EPI_ISL_417482 | 2020-03-09 |
| Ecuador/HGSQ-USFQ-018/2020 | EPI_ISL_422563 | 2020-03-30 |
| Egypt/NRC-01/2020 | EPI_ISL_430820 | 2020-03-18 |
| Egypt/NRC-03/2020 | EPI_ISL_430819 | 2020-03-18 |
| England/01/2020 | EPI_ISL_407071 | 2020-01-29 |
| England/02/2020 | EPI_ISL_407073 | 2020-01-29 |
| England/BRIS-124876/2020 | EPI_ISL_443817 | 2020-03-25 |
| England/BRIS-125CE2/2020 | EPI_ISL_443794 | 2020-03-30 |
| England/CAMB-1AEBC6/2020 | EPI_ISL_448057 | 2020-05-02 |
| England/CAMB-1AEDA2/2020 | EPI_ISL_452862 | 2020-05-09 |
| England/CAMB-1AF521/2020 | EPI_ISL_459264 | 2020-04-30 |
| England/CAMB-1B05D2/2020 | EPI_ISL_448114 | 2020-05-06 |
| England/CAMB-1B07BE/2020 | EPI_ISL_452921 | 2020-05-07 |
| England/CAMB-7DCCE/2020 | EPI_ISL_441592 | 2020-04-07 |
| England/CAMB-83EA1/2020 | EPI_ISL_438704 | 2020-04-25 |
| England/CAMB-84769/2020 | EPI_ISL_440483 | 2020-02-28 |
| England/NORW-EA92F/2020 | EPI_ISL_461874 | 2020-05-20 |
| England/NOTT-111B28/2020 | EPI_ISL_461962 | 2020-06-01 |
| England/NOTT-111B37/2020 | EPI_ISL_461963 | 2020-06-01 |
| England/NOTT-111B46/2020 | EPI_ISL_461964 | 2020-06-01 |
| England/NOTT-111B64/2020 | EPI_ISL_461965 | 2020-06-02 |
| England/NOTT-111B73/2020 | EPI_ISL_461966 | 2020-06-02 |
| England/NOTT-111B82/2020 | EPI_ISL_461967 | 2020-06-02 |
| England/NOTT-111BA0/2020 | EPI_ISL_461968 | 2020-06-02 |
| England/NOTT-111BBF/2020 | EPI_ISL_461969 | 2020-06-02 |
| England/SHEF-C3BF9/2020 | EPI_ISL_441953 | 2020-03-26 |
| Finland/1/2020 | EPI_ISL_407079 | 2020-01-29 |
| Finland/13M58/2020 | EPI_ISL_418392 | 2020-03-13 |
| Finland/14M14/2020 | EPI_ISL_418403 | 2020-03-14 |
| Finland/FIN-25/2020 | EPI_ISL_412971 | 2020-02-25 |
| Finland/FIN-266/2020 | EPI_ISL_414646 | 2020-03-04 |
| France/ARA11950/2020 | EPI_ISL_419172 | 2020-03-21 |
| France/ARA12222/2020 | EPI_ISL_419179 | 2020-03-22 |
| France/B5689/2020 | EPI_ISL_443294 | 2020-04-06 |
| France/CIBU200107/2020 | EPI_ISL_437689 | 2020-02-27 |
| France/HF1463/2020 | EPI_ISL_429968 | 2020-02-21 |
| France/HF1465/2020 | EPI_ISL_418218 | 2020-02-21 |
| France/HF1645/2020 | EPI_ISL_418220 | 2020-02-28 |
| France/HF1684/2020 | EPI_ISL_414626 | 2020-02-29 |
| France/IDF0372/2020 | EPI_ISL_406596 | 2020-01-23 |
| France/IDF0373/2020 | EPI_ISL_406597 | 2020-01-23 |
| France/IDF2251/2020 | EPI_ISL_428355 | 2020-03-11 |
| France/IDF3163/2020 | EPI_ISL_420058 | 2020-03-20 |
| France/IDF4793/2020 | EPI_ISL_443259 | 2020-04-02 |
| France/IDF5577/2020 | EPI_ISL_443303 | 2020-04-09 |
| France/IDF5650/2020 | EPI_ISL_443284 | 2020-04-02 |
| France/IDF6037/2020 | EPI_ISL_443306 | 2020-04-02 |
| France/OCC-14/2020 | EPI_ISL_434629 | 2020-04-07 |
| France/OCC-16/2020 | EPI_ISL_434631 | 2020-04-08 |
| Fujian/13/2020 | EPI_ISL_411066 | 2020-01-22 |
| Gambia/GC19-015/2020 | EPI_ISL_428855 | 2020-03-17 |
| Gambia/GC19-026/2020 | EPI_ISL_428856 | 2020-03-21 |
| Gambia/GC19-029/2020 | EPI_ISL_428857 | 2020-04-20 |
| Georgia/Tb-1352/2020 | EPI_ISL_420140 | 2020-03-28 |
| Georgia/Tb-1679/2020 | EPI_ISL_420144 | 2020-04-01 |
| Georgia/Tb-273/2020 | EPI_ISL_416479 | 2020-03-05 |
| Georgia/Tb-477/2020 | EPI_ISL_415642 | 2020-03-10 |
| Georgia/Tb-537/2020 | EPI_ISL_416480 | 2020-03-11 |
| Georgia/Tb-54/2020 | EPI_ISL_415641 | 2020-02-27 |
| Georgia/Tb-6572/2020 | EPI_ISL_447056 | 2020-04-29 |
| Georgia/Tb-6598/2020 | EPI_ISL_447055 | 2020-04-29 |
| Georgia/Tb-673/2020 | EPI_ISL_416478 | 2020-03-14 |
| Georgia/Tb-712/2020 | EPI_ISL_416481 | 2020-03-16 |
| Georgia/Tb-82/2020 | EPI_ISL_415644 | 2020-02-28 |
| Germany/BAV-MVP0055/2020 | EPI_ISL_437254 | 2020-03-17 |
| Germany/BAV-MVP0075/2020 | EPI_ISL_437270 | 2020-03-29 |
| Germany/BAV-MVP0082/2020 | EPI_ISL_437276 | 2020-03-30 |
| Germany/BAV-MVP0090/2020 | EPI_ISL_437284 | 2020-04-02 |
| Germany/BAV-MVP0097/2020 | EPI_ISL_437289 | 2020-04-03 |
| Germany/BAV-MVP0105/2020 | EPI_ISL_437295 | 2020-04-12 |
| Germany/BAV-MVP0113/2020 | EPI_ISL_451937 | 2020-03-17 |
| Germany/BavPat1-ChVir929/2020 | EPI_ISL_450198 | 2020-01-28 |
| Germany/BavPat1/2020 | EPI_ISL_406862 | 2020-01-28 |
| Germany/BavPat2-ChVir984-ChVir1017/2020 | EPI_ISL_450209 | 2020-01-30 |
| Germany/BavPat4-ChVir1019/2020 | EPI_ISL_450199 | 2020-01-29 |
| Germany/Cento-70001814/2020 | EPI_ISL_459962 | 2020-04-01 |
| Germany/BY-IMB06600/2020 | EPI_ISL_732538 | 2020-05-26 |
| Germany/BY-IMB06861/2020 | EPI_ISL_732539 | 2020-06-02 |
| Germany/BY-IMB07324/2020 | EPI_ISL_732540 | 2020-06-08 |
| Germany/BY-IMB07597/2020 | EPI_ISL_732537 | 2020-06-16 |
| Germany/BY-IMB07884/2020 | EPI_ISL_732535 | 2020-06-25 |
| Germany/BY-IMB07990/2020 | EPI_ISL_732536 | 2020-06-29 |
| Germany/BY-IMB08291/2020 | EPI_ISL_732534 | 2020-07-07 |
| Germany/BY-IMB09138/2020 | EPI_ISL_732531 | 2020-07-28 |
| Germany/BY-IMB09442/2020 | EPI_ISL_732532 | 2020-08-11 |
| Germany/BY-IMB11525/2020 | EPI_ISL_732658 | 2020-10-07 |
| Germany/BAV-MVP0283/2020 | EPI_ISL_466909 | 2020-05-11 |
| Germany/BY-MVP-000003168/2020 | EPI_ISL_1751601 | 2020-07-06 |
| Germany/BY-MVP-000003228/2020 | EPI_ISL_1751602 | 2020-07-09 |
| Germany/BY-MVP-000003380/2020 | EPI_ISL_1751603 | 2020-07-13 |
| Germany/BY-MVP-000003390/2020 | EPI_ISL_1751604 | 2020-07-16 |
| Germany/BY-MVP-000003311/2020 | EPI_ISL_1751605 | 2020-07-23 |
| Germany/BY-MVP-000003259/2020 | EPI_ISL_1751606 | 2020-08-31 |
| Germany/BY-MVP-000003294/2020 | EPI_ISL_1751607 | 2020-09-10 |
| Germany/BY-MVP-000003345/2020 | EPI_ISL_1751608 | 2020-09-17 |
| Germany/BY-MVP-000003219/2020 | EPI_ISL_1751611 | 2020-09-24 |
| Germany/BY-MVP-000002093/2020 | EPI_ISL_1751623 | 2020-10-05 |
| Germany/NRW-05/2020 | EPI_ISL_414504 | 2020-02-26 |
| Ghana/2850_S15/2020 | EPI_ISL_422406 | 2020-03-29 |
| Ghana/3176_S11/2020 | EPI_ISL_422402 | 2020-03-30 |
| Ghana/3177_S12/2020 | EPI_ISL_422403 | 2020-03-30 |
| Greece/127_HPI/2020 | EPI_ISL_430469 | 2020-02-29 |
| Greece/251_32400/2020 | EPI_ISL_437901 | 2020-03-11 |
| Greece/52_37266/2020 | EPI_ISL_437910 | 2020-04-01 |
| Greece/53/2020 | EPI_ISL_434466 | 2020-04-04 |
| Guam/GU_NHG_01/2020 | EPI_ISL_444998 | 2020-03-26 |
| Guam/GU_NHG_02/2020 | EPI_ISL_444999 | 2020-03-24 |
| Guam/GU_NHG_03/2020 | EPI_ISL_445000 | 2020-03-20 |
| Guangdong/20SF316/2020 | EPI_ISL_428461 | 2020-01-24 |
| Guangdong/SYSU-IHV/2020 | EPI_ISL_444969 | 2020-04-16 |
| Guangzhou/GZMU0092/2020 | EPI_ISL_457694 | 2020-02-17 |
| Hangzhou/HZ185/2020 | EPI_ISL_418510 | 2020-01-23 |
| HongKong/HKPU102_2802/2020 | EPI_ISL_420455 | 2020-03-04 |
| HongKong/HKPU19_0402/2020 | EPI_ISL_417181 | 2020-02-05 |
| HongKong/HKPU2_1801/2020 | EPI_ISL_417177 | 2020-01-23 |
| HongKong/HKPU30_2901/2020 | EPI_ISL_417188 | 2020-02-08 |
| HongKong/HKPU32_0402/2020 | EPI_ISL_417193 | 2020-02-09 |
| HongKong/HKPU36-0702/2020 | EPI_ISL_418815 | 2020-02-09 |
| HongKong/HKPU39-3001/2020 | EPI_ISL_419214 | 2020-02-10 |
| HongKong/HKSH0003/2020 | EPI_ISL_430018 | 2020-03-14 |
| HongKong/HKSH0004/2020 | EPI_ISL_430063 | 2020-03-14 |
| HongKong/HKSH0007/2020 | EPI_ISL_451957 | 2020-04-01 |
| HongKong/HKU-902b/2020 | EPI_ISL_434564 | 2020-01-24 |
| HongKong/HKU-903b/2020 | EPI_ISL_434566 | 2020-01-27 |
| HongKong/HKU-908b/2020 | EPI_ISL_434570 | 2020-01-29 |
| HongKong/HKU-911a/2020 | EPI_ISL_450409 | 2020-01-30 |
| HongKong/VB20017970-2/2020 | EPI_ISL_417064 | 2020-01-21 |
| HongKong/VM20002493-2/2020 | EPI_ISL_414527 | 2020-02-09 |
| HongKong/VM2003179/2020 | EPI_ISL_450405 | 2020-03-08 |
| Hungary/MBL-465/2020 | EPI_ISL_435423 | 2020-03-27 |
| Hungary/SRC-00126/2020 | EPI_ISL_435405 | 2020-03-22 |
| Hungary/SRC-00278w/2020 | EPI_ISL_435427 | 2020-03-25 |
| Hungary/SRC-00541/2020 | EPI_ISL_435411 | 2020-03-27 |
| Hungary/SRC-00777/2020 | EPI_ISL_435417 | 2020-03-30 |
| Hungary/SRC-00792/2020 | EPI_ISL_435412 | 2020-03-30 |
| Hungary/SRC-00836/2020 | EPI_ISL_435415 | 2020-03-30 |
| Hungary/SRC-01136/2020 | EPI_ISL_435418 | 2020-04-02 |
| Iceland/13/2020 | EPI_ISL_417765 | 2020-02-27 |
| Iceland/233/2020 | EPI_ISL_417561 | 2020-03-17 |
| Iceland/289/2020 | EPI_ISL_417617 | 2020-03-18 |
| Iceland/541/2020 | EPI_ISL_424561 | 2020-03-27 |
| Iceland/598/2020 | EPI_ISL_424618 | 2020-03-27 |
| Iceland/87/2020 | EPI_ISL_417729 | 2020-03-10 |
| India/1-27/2020 | EPI_ISL_413522 | 2020-01-27 |
| India/1-31/2020 | EPI_ISL_413523 | 2020-01-31 |
| India/CCMB_J131/2020 | EPI_ISL_447566 | 2020-04-01 |
| India/CCMB_J235/2020 | EPI_ISL_447852 | 2020-04-01 |
| India/CCMB_J350/2020 | EPI_ISL_447854 | 2020-04-02 |
| India/GBRC103/2020 | EPI_ISL_451666 | 2020-05-04 |
| India/GBRC124/2020 | EPI_ISL_455021 | 2020-05-02 |
| India/GBRC156/2020 | EPI_ISL_461485 | 2020-05-27 |
| India/GBRC31/2020 | EPI_ISL_444462 | 2020-04-29 |
| India/GBRC64/2020 | EPI_ISL_447039 | 2020-05-03 |
| India/MaxCov0019_CSIR-IGIB/2020 | EPI_ISL_459921 | 2020-05-08 |
| India/NCDC-01257/2020 | EPI_ISL_435060 | 2020-03-12 |
| India/NCDC-01537/2020 | EPI_ISL_435061 | 2020-03-16 |
| India/NCDC-02318/2020 | EPI_ISL_435079 | 2020-03-29 |
| India/NCDC-02332/2020 | EPI_ISL_435096 | 2020-03-29 |
| India/NCDC-3271/2020 | EPI_ISL_436433 | 2020-04-05 |
| India/NCDC-3394/2020 | EPI_ISL_436435 | 2020-04-09 |
| India/NIV-11681/2020 | EPI_ISL_452195 | 2020-04-19 |
| India/RMRC92/2020 | EPI_ISL_455787 | 2020-05-04 |
| Indonesia/EJ-ITD1238Sp/2020 | EPI_ISL_458079 | 2020-03-30 |
| Indonesia/EJ-ITD1273NT/2020 | EPI_ISL_458081 | 2020-03-30 |
| Indonesia/EJ-ITD3101NT/2020 | EPI_ISL_458083 | 2020-04-11 |
| Indonesia/EJ-ITD3590NT/2020 | EPI_ISL_437188 | 2020-04-14 |
| Indonesia/EJ-ITD853Sp/2020 | EPI_ISL_437187 | 2020-03-25 |
| Indonesia/JKT-EIJK01/2020 | EPI_ISL_437189 | 2020-03-26 |
| Indonesia/JKT-EIJK0141/2020 | EPI_ISL_435281 | 2020-03-17 |
| Indonesia/JKT-EIJK03/2020 | EPI_ISL_437191 | 2020-03-27 |
| Indonesia/JKT-EIJK0317/2020 | EPI_ISL_435282 | 2020-03-19 |
| Indonesia/JKT-EIJK04/2020 | EPI_ISL_437192 | 2020-04-01 |
| Indonesia/JKT-EIJK2444/2020 | EPI_ISL_435283 | 2020-03-30 |
| Iran/KHGRC-1.1-IPI-8206/2020 | EPI_ISL_442523 | 2020-03-09 |
| Iran/KHGRC-2-2162/2020 | EPI_ISL_442044 | 2020-03-26 |
| Iran/KHGRC-3-2178/2020 | EPI_ISL_445088 | 2020-03-26 |
| Ireland/22901/2020 | EPI_ISL_418582 | 2020-03-10 |
| Ireland/Limerick-19933/2020 | EPI_ISL_414585 | 2020-03-03 |
| Israel/2089697/2020 | EPI_ISL_447369 | 2020-04-01 |
| Israel/51141225/2020 | EPI_ISL_447319 | 2020-03-22 |
| Israel/51146683/2020 | EPI_ISL_447311 | 2020-04-05 |
| Israel/990059204/2020 | EPI_ISL_447278 | 2020-03-25 |
| Israel/990059230/2020 | EPI_ISL_447276 | 2020-03-25 |
| Israel/990059244/2020 | EPI_ISL_447270 | 2020-03-25 |
| Israel/CVL-n3120/2020 | EPI_ISL_447251 | 2020-03-09 |
| Israel/ISR_JP0320/2020 | EPI_ISL_419211 | 2020-02-23 |
| Italy/2629/2020 | EPI_ISL_457700 | 2020-03-06 |
| Italy/FVG-ICGEB_S9/2020 | EPI_ISL_417423 | 2020-03-01 |
| Italy/INMI1-cs/2020 | EPI_ISL_410546 | 2020-01-29 |
| Italy/INMI2-N/2020 | EPI_ISL_451302 | 2020-01-30 |
| Italy/IZSPB_1259/2020 | EPI_ISL_451962 | 2020-03-20 |
| Italy/MI-5925-22Feb/2020 | EPI_ISL_460091 | 2020-02-22 |
| Italy/PV-5314-N/2020 | EPI_ISL_451307 | 2020-02-21 |
| ITALY/SardiniaNuoro04039046/2020 | EPI_ISL_458084 | 2020-04-03 |
| Italy/SPL1/2020 | EPI_ISL_412974 | 2020-01-29 |
| Italy/TE12337/2020 | EPI_ISL_435146 | 2020-04-07 |
| Italy/TE13484/2020 | EPI_ISL_435151 | 2020-04-08 |
| Italy/TE13491/2020 | EPI_ISL_435148 | 2020-04-08 |
| Italy/TE26533/2020 | EPI_ISL_436726 | 2020-04-27 |
| Italy/TE26539/2020 | EPI_ISL_436727 | 2020-04-27 |
| Italy/TE26540/2020 | EPI_ISL_436728 | 2020-04-27 |
| Italy/TE26643/2020 | EPI_ISL_436729 | 2020-04-27 |
| Italy/TE5541/2020 | EPI_ISL_436719 | 2020-03-20 |
| Italy/TE6571/2020 | EPI_ISL_429231 | 2020-03-24 |
| Italy/VR_20COV46-8/2020 | EPI_ISL_452190 | 2020-04-03 |
| Jamaica/JM-CDC-0078/2020 | EPI_ISL_450792 | 2020-03-11 |
| Jamaica/JM-CDC-0869/2020 | EPI_ISL_450793 | 2020-03-09 |
| Jamaica/JM-CDC-4376/2020 | EPI_ISL_450794 | 2020-03-11 |
| Jamaica/JM-CDC-5836/2020 | EPI_ISL_450795 | 2020-03-14 |
| Jamaica/JM-CDC-6365/2020 | EPI_ISL_450796 | 2020-03-16 |
| Jamaica/JM-CDC-6603/2020 | EPI_ISL_450797 | 2020-03-16 |
| Jamaica/JM-CDC-7286/2020 | EPI_ISL_450799 | 2020-03-17 |
| Japan/AI-I-004/2020 | EPI_ISL_407084 | 2020-01-25 |
| Japan/Donner14/2020 | EPI_ISL_438958 | 2020-04-10 |
| Japan/Donner15/2020 | EPI_ISL_438959 | 2020-04-10 |
| Japan/Donner19/2020 | EPI_ISL_438963 | 2020-04-13 |
| Japan/Donner24/2020 | EPI_ISL_438968 | 2020-04-20 |
| Japan/Donner26/2020 | EPI_ISL_438970 | 2020-03-25 |
| Japan/DP0107/2020 | EPI_ISL_416574 | 2020-02-15 |
| Japan/DP0286/2020 | EPI_ISL_416588 | 2020-02-16 |
| Japan/DP0346/2020 | EPI_ISL_416597 | 2020-02-16 |
| Japan/DP0457/2020 | EPI_ISL_416601 | 2020-02-16 |
| Japan/DP0462/2020 | EPI_ISL_416602 | 2020-02-16 |
| Japan/DP0644/2020 | EPI_ISL_416611 | 2020-02-17 |
| Japan/Hu_Kng_19-865/2020 | EPI_ISL_445183 | 2020-03-23 |
| Japan/KY-V-029/2020 | EPI_ISL_408669 | 2020-01-29 |
| Japan/OS-20-07-1/2020 | EPI_ISL_410532 | 2020-01-23 |
| Japan/P2-2/2020 | EPI_ISL_419298 | 2020-03-10 |
| Japan/P3-1/2020 | EPI_ISL_419299 | 2020-03-09 |
| Japan/P3-2/2020 | EPI_ISL_419300 | 2020-03-20 |
| Japan/P4-1/2020 | EPI_ISL_419301 | 2020-03-11 |
| Japan/P5-2/2020 | EPI_ISL_419310 | 2020-03-13 |
| Jordan/SR-0333/2020 | EPI_ISL_450186 | 2020-04-07 |
| Jordan/SR-0336/2020 | EPI_ISL_450188 | 2020-04-06 |
| Jordan/SR-0338/2020 | EPI_ISL_450189 | 2020-04-06 |
| Jordan/SR-034/2020 | EPI_ISL_429994 | 2020-03-17 |
| Jordan/SR-046/2020 | EPI_ISL_430004 | 2020-03-17 |
| Jordan/SR-047/2020 | EPI_ISL_430005 | 2020-03-26 |
| Jordan/SR-051/2020 | EPI_ISL_430008 | 2020-04-04 |
| Jordan/SR-055/2020 | EPI_ISL_430013 | 2020-04-02 |
| Kazakhstan/16173/2020 | EPI_ISL_454497 | 2020-05-14 |
| Kazakhstan/22044/2020 | EPI_ISL_454584 | 2020-04-21 |
| Kazakhstan/26474/2020 | EPI_ISL_454505 | 2020-04-26 |
| Kazakhstan/26585/2020 | EPI_ISL_454514 | 2020-04-26 |
| Kazakhstan/26617/2020 | EPI_ISL_454515 | 2020-04-26 |
| Kazakhstan/26828/2020 | EPI_ISL_454517 | 2020-04-26 |
| Kazakhstan/26829/2020 | EPI_ISL_454518 | 2020-04-26 |
| Kazakhstan/33496/2020 | EPI_ISL_454585 | 2020-05-04 |
| Kazakhstan/7263/2020 | EPI_ISL_454571 | 2020-03-25 |
| Kazakhstan/7341/2020 | EPI_ISL_454572 | 2020-03-25 |
| Kazakhstan/NCB-1/2020 | EPI_ISL_435045 | 2020-03-22 |
| Kazakhstan/NCB-2/2020 | EPI_ISL_435046 | 2020-03-25 |
| Kazakhstan/NCB-3/2020 | EPI_ISL_435047 | 2020-03-25 |
| Kenya/D5/2020 | EPI_ISL_457999 | 2020-05-22 |
| Kenya/D6/2020 | EPI_ISL_458000 | 2020-03-17 |
| Korea/KCDC2005/2020 | EPI_ISL_426166 | 2020-02-04 |
| Kuwait/KU001/2020 | EPI_ISL_421652 | 2020-03-16 |
| Kuwait/KU006/2020 | EPI_ISL_422424 | 2020-03-15 |
| Kuwait/KU008/2020 | EPI_ISL_422427 | 2020-03-16 |
| Kuwait/KU12/2020 | EPI_ISL_416458 | 2020-03-02 |
| Latvia/01/2020 | EPI_ISL_421653 | 2020-03-25 |
| Latvia/013/2020 | EPI_ISL_437092 | 2020-03-20 |
| Latvia/015/2020 | EPI_ISL_437094 | 2020-03-23 |
| Latvia/018/2020 | EPI_ISL_450518 | 2020-04-18 |
| Latvia/019/2020 | EPI_ISL_450519 | 2020-04-14 |
| Latvia/02/2020 | EPI_ISL_421654 | 2020-03-25 |
| Latvia/020/2020 | EPI_ISL_450520 | 2020-04-28 |
| Latvia/021/2020 | EPI_ISL_450521 | 2020-04-28 |
| Latvia/022/2020 | EPI_ISL_450522 | 2020-04-28 |
| Latvia/024/2020 | EPI_ISL_450524 | 2020-04-19 |
| Latvia/07/2020 | EPI_ISL_426287 | 2020-03-30 |
| Latvia/09/2020 | EPI_ISL_426289 | 2020-03-30 |
| Lebanon/S1_758/2020 | EPI_ISL_450508 | 2020-03-04 |
| Lebanon/S2_759/2020 | EPI_ISL_450509 | 2020-03-15 |
| Lebanon/S4_761/2020 | EPI_ISL_450511 | 2020-03-04 |
| Lebanon/S5_762/2020 | EPI_ISL_450512 | 2020-02-27 |
| Lebanon/S8_767/2020 | EPI_ISL_450514 | 2020-03-13 |
| Lebanon/S9_764/2020 | EPI_ISL_450515 | 2020-03-11 |
| Luxembourg/LNS0000001/2020 | EPI_ISL_419562 | 2020-02-29 |
| Luxembourg/LNS0078676/2020 | EPI_ISL_428949 | 2020-04-03 |
| Luxembourg/LNS0724201/2020 | EPI_ISL_445054 | 2020-04-22 |
| Luxembourg/LNS0819394/2020 | EPI_ISL_421746 | 2020-03-17 |
| Luxembourg/LNS0877496/2020 | EPI_ISL_421749 | 2020-03-17 |
| Luxembourg/LNS1586475/2020 | EPI_ISL_445075 | 2020-05-08 |
| Luxembourg/LNS3162972/2020 | EPI_ISL_434513 | 2020-04-14 |
| Luxembourg/LNS4107430/2020 | EPI_ISL_429772 | 2020-03-28 |
| Luxembourg/LNS4641661/2020 | EPI_ISL_429707 | 2020-03-18 |
| Luxembourg/LNS6282845/2020 | EPI_ISL_417533 | 2020-03-18 |
| Luxembourg/LNS6387933/2020 | EPI_ISL_459900 | 2020-05-15 |
| Luxembourg/LNS6546078/2020 | EPI_ISL_445053 | 2020-04-30 |
| Luxembourg/LNS6733162/2020 | EPI_ISL_459902 | 2020-05-19 |
| Luxembourg/LNS7580831/2020 | EPI_ISL_429732 | 2020-03-23 |
| Luxembourg/LNS7753431/2020 | EPI_ISL_419595 | 2020-03-12 |
| Luxembourg/LNS7820945/2020 | EPI_ISL_459906 | 2020-05-18 |
| Luxembourg/LNS8602041/2020 | EPI_ISL_421761 | 2020-03-17 |
| Luxembourg/LNS9984061/2020 | EPI_ISL_429724 | 2020-03-19 |
| Luxembourg/Lux1/2020 | EPI_ISL_413593 | 2020-02-29 |
| Malaysia/188407/2020 | EPI_ISL_417918 | 2020-03-18 |
| Malaysia/189332/2020 | EPI_ISL_417917 | 2020-03-20 |
| Malaysia/IIUM316/2020 | EPI_ISL_455312 | 2020-04-09 |
| Malaysia/IIUM91/2020 | EPI_ISL_455313 | 2020-04-02 |
| Malaysia/IMR_WC10180/2020 | EPI_ISL_459957 | 2020-04-01 |
| Malaysia/IMR_WC1098/2020 | EPI_ISL_430442 | 2020-02-29 |
| Malaysia/IMR_WC1114/2020 | EPI_ISL_455793 | 2020-02-29 |
| Malaysia/IMR_WC1170/2020 | EPI_ISL_430440 | 2020-03-05 |
| Malaysia/IMR_WC1177/2020 | EPI_ISL_430439 | 2020-03-05 |
| Malaysia/IMR_WC2423/2020 | EPI_ISL_459953 | 2020-03-16 |
| Malaysia/IMR_WC2453/2020 | EPI_ISL_459954 | 2020-03-16 |
| Malaysia/IMR_WC2665/2020 | EPI_ISL_459955 | 2020-03-18 |
| Malaysia/IMR_WC413/2020 | EPI_ISL_455791 | 2020-02-08 |
| Malaysia/IMR_WC458/2020 | EPI_ISL_455792 | 2020-02-09 |
| Malaysia/IMR_WC627/2020 | EPI_ISL_430444 | 2020-02-12 |
| Malaysia/IMR_WC9127/2020 | EPI_ISL_459956 | 2020-03-30 |
| Malaysia/MKAK-CL-2020-5045/2020 | EPI_ISL_416829 | 2020-01-24 |
| Malaysia/MKAK-CL-2020-5096/2020 | EPI_ISL_416885 | 2020-01-30 |
| Malaysia/MKAK-CL-2020-6430/2020 | EPI_ISL_416886 | 2020-02-04 |
| Mexico/CDMX-InDRE_01/2020 | EPI_ISL_412972 | 2020-02-27 |
| Mexico/CDMX-InDRE_07/2020 | EPI_ISL_452139 | 2020-02-28 |
| Mexico/CDMX-InDRE_18/2020 | EPI_ISL_455456 | 2020-03-12 |
| Mexico/CDMX-INER_02/2020 | EPI_ISL_424348 | 2020-03-13 |
| Mexico/CDMX-INER_04/2020 | EPI_ISL_424626 | 2020-03-15 |
| mink/Netherlands/NB02_06KS/2020 | EPI_ISL_447628 | 2020-04-29 |
| Morocco/15N/2020 | EPI_ISL_458150 | 2020-05-15 |
| Morocco/6891/2020 | EPI_ISL_459969 | 2020-03-20 |
| Morocco/6893/2020 | EPI_ISL_459971 | 2020-03-18 |
| Morocco/6894/2020 | EPI_ISL_459972 | 2020-03-20 |
| Morocco/6895/2020 | EPI_ISL_459973 | 2020-03-20 |
| Morocco/6898/2020 | EPI_ISL_459976 | 2020-03-16 |
| Morocco/6900/2020 | EPI_ISL_459978 | 2020-04-20 |
| Morocco/6901/2020 | EPI_ISL_459979 | 2020-04-19 |
| Morocco/6902/2020 | EPI_ISL_459980 | 2020-04-19 |
| Morocco/6904/2020 | EPI_ISL_459982 | 2020-04-18 |
| Morocco/6906/2020 | EPI_ISL_459984 | 2020-04-06 |
| Morocco/OUA677-19/2020 | EPI_ISL_451400 | 2020-04-23 |
| Nepal/61/2020 | EPI_ISL_410301 | 2020-01-13 |
| Netherlands/Delft_1363424/2020 | EPI_ISL_413569 | 2020-02-28 |
| Netherlands/Gelderland_136/2020 | EPI_ISL_460896 | 2020-05-22 |
| Netherlands/Gelderland_73/2020 | EPI_ISL_460972 | 2020-05-18 |
| Netherlands/Gelderland_95/2020 | EPI_ISL_460994 | 2020-05-21 |
| Netherlands/Helmond_1363548/2020 | EPI_ISL_413574 | 2020-02-29 |
| Netherlands/Limburg_16/2020 | EPI_ISL_461004 | 2020-05-13 |
| Netherlands/Loon_op_zand_1363512/2020 | EPI_ISL_413576 | 2020-02-29 |
| Netherlands/NA_113/2020 | EPI_ISL_422661 | 2020-03-10 |
| Netherlands/NA_333/2020 | EPI_ISL_455138 | 2020-04-03 |
| Netherlands/NA_349/2020 | EPI_ISL_455154 | 2020-04-06 |
| Netherlands/NA_408/2020 | EPI_ISL_455210 | 2020-03-19 |
| Netherlands/NA_643/2020 | EPI_ISL_461078 | 2020-03-31 |
| Netherlands/NA_649/2020 | EPI_ISL_461084 | 2020-05-07 |
| Netherlands/NA_678/2020 | EPI_ISL_461113 | 2020-03-02 |
| Netherlands/NoordBrabant_10003/2020 | EPI_ISL_454752 | 2020-02-28 |
| Netherlands/NoordHolland_10002/2020 | EPI_ISL_454751 | 2020-02-28 |
| Netherlands/NoordHolland_29/2020 | EPI_ISL_461219 | 2020-05-02 |
| Netherlands/Oss_1363500/2020 | EPI_ISL_413581 | 2020-02-29 |
| Netherlands/Overijssel_35/2020 | EPI_ISL_461227 | 2020-05-26 |
| Netherlands/Tilburg_1363354/2020 | EPI_ISL_413586 | 2020-02-27 |
| Netherlands/Zeeland_6/2020 | EPI_ISL_461288 | 2020-04-02 |
| Netherlands/ZuidHolland_10004/2020 | EPI_ISL_454753 | 2020-02-28 |
| Netherlands/ZuidHolland_10005/2020 | EPI_ISL_454754 | 2020-02-28 |
| Netherlands/ZuidHolland_203/2020 | EPI_ISL_461375 | 2020-05-03 |
| Netherlands/ZuidHolland_217/2020 | EPI_ISL_461389 | 2020-05-09 |
| Netherlands/ZuidHolland_37/2020 | EPI_ISL_422909 | 2020-03-17 |
| NewZealand/01/2020 | EPI_ISL_413490 | 2020-02-27 |
| NewZealand/20VR0760/2020 | EPI_ISL_456165 | 2020-03-18 |
| NewZealand/20VR1289/2020 | EPI_ISL_456211 | 2020-03-21 |
| NewZealand/20VR1561/2020 | EPI_ISL_456222 | 2020-03-24 |
| NewZealand/20VR1778/2020 | EPI_ISL_456247 | 2020-03-25 |
| NewZealand/20VR1780/2020 | EPI_ISL_456249 | 2020-03-26 |
| NewZealand/20VR1785/2020 | EPI_ISL_456254 | 2020-03-26 |
| NewZealand/20VR1986/2020 | EPI_ISL_456323 | 2020-04-07 |
| NewZealand/20VR1997/2020 | EPI_ISL_456326 | 2020-04-01 |
| Nigeria/KW017-CV24/2020 | EPI_ISL_455362 | 2020-04-10 |
| Nigeria/Lagos01/2020 | EPI_ISL_413550 | 2020-02-27 |
| Nigeria/OS055-CV8/2020 | EPI_ISL_455418 | 2020-03-29 |
| Nigeria/OS116-CV17/2020 | EPI_ISL_455425 | 2020-03-29 |
| Nigeria/OY045A-CV35/2020 | EPI_ISL_455431 | 2020-04-02 |
| NorthernIreland/HSCNI01/2020 | EPI_ISL_414949 | 2020-02-26 |
| Norway/1379/2020 | EPI_ISL_417483 | 2020-02-27 |
| Norway/1380/2020 | EPI_ISL_417484 | 2020-02-26 |
| Norway/1443/2020 | EPI_ISL_417490 | 2020-02-27 |
| Norway/1694/2020 | EPI_ISL_420136 | 2020-03-04 |
| Norway/2052/2020 | EPI_ISL_420148 | 2020-03-14 |
| Norway/2065/2020 | EPI_ISL_420149 | 2020-03-09 |
| Norway/2087/2020 | EPI_ISL_420151 | 2020-03-17 |
| Norway/2356-2/2020 | EPI_ISL_449786 | 2020-04-08 |
| Norway/2380/2020 | EPI_ISL_449787 | 2020-04-12 |
| Norway/2381/2020 | EPI_ISL_449788 | 2020-04-11 |
| Norway/2382/2020 | EPI_ISL_449789 | 2020-03-30 |
| Norway/2383/2020 | EPI_ISL_449790 | 2020-04-01 |
| Norway/2386/2020 | EPI_ISL_449791 | 2020-04-04 |
| Norway/2387/2020 | EPI_ISL_449792 | 2020-04-05 |
| Norway/2388/2020 | EPI_ISL_449793 | 2020-04-02 |
| Norway/2390/2020 | EPI_ISL_449794 | 2020-04-02 |
| Norway/Trondheim-E9/2020 | EPI_ISL_450351 | 2020-03-11 |
| Norway/Trondheim-S4/2020 | EPI_ISL_450346 | 2020-03-25 |
| Norway/Trondheim-S5/2020 | EPI_ISL_450347 | 2020-03-25 |
| Oman/205027055/2020 | EPI_ISL_458123 | 2020-04-06 |
| Oman/205027285/2020 | EPI_ISL_458122 | 2020-04-07 |
| Oman/205028472/2020 | EPI_ISL_458119 | 2020-04-11 |
| Oman/205028718/2020 | EPI_ISL_457702 | 2020-04-12 |
| Oman/205029065/2020 | EPI_ISL_457982 | 2020-04-13 |
| Oman/205030448/2020 | EPI_ISL_458121 | 2020-04-20 |
| Oman/205031572/2020 | EPI_ISL_458126 | 2020-04-25 |
| Oman/205033013/2020 | EPI_ISL_458116 | 2020-05-01 |
| Oman/205033293/2020 | EPI_ISL_457983 | 2020-05-03 |
| Oman/205034466/2020 | EPI_ISL_457705 | 2020-05-08 |
| Oman/205034603/2020 | EPI_ISL_458117 | 2020-05-09 |
| Oman/RESP-20-2181/2020 | EPI_ISL_457939 | 2020-03-17 |
| Oman/RESP-20-3343/2020 | EPI_ISL_457985 | 2020-03-18 |
| Oman/RESP-20-3700/2020 | EPI_ISL_457986 | 2020-03-20 |
| Oman/RESP-20-797/2020 | EPI_ISL_457701 | 2020-02-23 |
| Oman/RESP-20-837/2020 | EPI_ISL_457704 | 2020-02-24 |
| Pakistan/Gilgit1/2020 | EPI_ISL_417444 | 2020-03-04 |
| Pakistan/KHI1/2020 | EPI_ISL_451958 | 2020-03-16 |
| Panama/328677/2020 | EPI_ISL_415152 | 2020-03-06 |
| Peru/010/2020 | EPI_ISL_415787 | 2020-03-10 |
| Philippines/PGC02/2020 | EPI_ISL_434554 | 2020-03-26 |
| Philippines/PGC06/2020 | EPI_ISL_434558 | 2020-03-28 |
| Philippines/RITM-04/2020 | EPI_ISL_430840 | 2020-03-08 |
| Philippines/RITM-07/2020 | EPI_ISL_430845 | 2020-03-23 |
| Poland/1109171/2020 | EPI_ISL_428236 | 2020-03-27 |
| Poland/IHG_PAS_1_77/2020 | EPI_ISL_450338 | 2020-04-11 |
| Poland/PL_P13/2020 | EPI_ISL_451974 | 2020-04-03 |
| Poland/PL_P15/2020 | EPI_ISL_451976 | 2020-04-07 |
| Poland/PL_P2/2020 | EPI_ISL_428925 | 2020-03-28 |
| Poland/PL_P24/2020 | EPI_ISL_451985 | 2020-03-29 |
| Poland/PL_P25/2020 | EPI_ISL_451986 | 2020-04-07 |
| Poland/PL_P27/2020 | EPI_ISL_455440 | 2020-03-27 |
| Poland/PL_P35/2020 | EPI_ISL_455448 | 2020-04-01 |
| Poland/PL_P9/2020 | EPI_ISL_428932 | 2020-03-28 |
| Poland/Pom12/2020 | EPI_ISL_451653 | 2020-05-04 |
| Poland/Pom2/2020 | EPI_ISL_450746 | 2020-05-08 |
| Poland/Pom4/2020 | EPI_ISL_451645 | 2020-05-02 |
| Poland/Sla8/2020 | EPI_ISL_451662 | 2020-05-05 |
| Poland/Sla9/2020 | EPI_ISL_451663 | 2020-05-05 |
| Portugal/PT0173/2020 | EPI_ISL_453889 | 2020-03-28 |
| Portugal/PT0221/2020 | EPI_ISL_453935 | 2020-03-30 |
| Portugal/PT0487/2020 | EPI_ISL_454211 | 2020-04-01 |
| Portugal/PT0497/2020 | EPI_ISL_454221 | 2020-05-01 |
| Portugal/PT0508/2020 | EPI_ISL_454232 | 2020-03-19 |
| Portugal/PT0548/2020 | EPI_ISL_454272 | 2020-05-02 |
| Portugal/PT0563/2020 | EPI_ISL_454286 | 2020-05-02 |
| Portugal/PT0593/2020 | EPI_ISL_454316 | 2020-05-04 |
| Portugal/PT0621/2020 | EPI_ISL_454344 | 2020-03-25 |
| Romania/278406/2020 | EPI_ISL_445220 | 2020-04-30 |
| Romania/279067/2020 | EPI_ISL_445243 | 2020-04-30 |
| Romania/279068/2020 | EPI_ISL_447054 | 2020-04-30 |
| Romania/284056/2020 | EPI_ISL_455473 | 2020-05-14 |
| Romania/284168/2020 | EPI_ISL_455472 | 2020-05-13 |
| Romania/284468/2020 | EPI_ISL_455479 | 2020-05-14 |
| Romania/284489/2020 | EPI_ISL_455470 | 2020-05-14 |
| Romania/284508/2020 | EPI_ISL_455471 | 2020-05-14 |
| Romania/285388/2020 | EPI_ISL_455476 | 2020-05-17 |
| Russia/Krasnodar-63401/2020 | EPI_ISL_428867 | 2020-03-11 |
| Russia/Perm-82707/2020 | EPI_ISL_428895 | 2020-03-24 |
| Russia/Primorskiy-79001/2020 | EPI_ISL_428903 | 2020-03-22 |
| Russia/StPetersburg-RII4326S/2020 | EPI_ISL_427337 | 2020-03-25 |
| Russia/StPetersburg-RII5634S/2020 | EPI_ISL_430093 | 2020-04-14 |
| Russia/StPetersburg-RII5635S/2020 | EPI_ISL_430094 | 2020-04-14 |
| Russia/StPetersburg-RII7603S/2020 | EPI_ISL_450263 | 2020-04-21 |
| Russia/Ulan-Ude-RII4562V/2020 | EPI_ISL_430112 | 2020-03-25 |
| SaudiArabia/KAUST-Jeddah59/2020 | EPI_ISL_437496 | 2020-04-01 |
| SaudiArabia/KAUST-Madinah23/2020 | EPI_ISL_437482 | 2020-03-29 |
| SaudiArabia/KAUST-Madinah258/2020 | EPI_ISL_437742 | 2020-04-20 |
| SaudiArabia/KAUST-Madinah263/2020 | EPI_ISL_437746 | 2020-04-20 |
| SaudiArabia/KAUST-Madinah27/2020 | EPI_ISL_437484 | 2020-03-29 |
| SaudiArabia/KAUST-Madinah54/2020 | EPI_ISL_437493 | 2020-03-29 |
| SaudiArabia/KAUST-Madinah55/2020 | EPI_ISL_437494 | 2020-03-29 |
| SaudiArabia/KAUST-Makkah124/2020 | EPI_ISL_437691 | 2020-04-05 |
| SaudiArabia/KAUST-Makkah196/2020 | EPI_ISL_437710 | 2020-04-14 |
| SaudiArabia/KAUST-Makkah234/2020 | EPI_ISL_437730 | 2020-04-16 |
| SaudiArabia/KAUST-Makkah90/2020 | EPI_ISL_437761 | 2020-04-02 |
| SaudiArabia/SCDC-3324/2020 | EPI_ISL_416522 | 2020-03-10 |
| Scotland/CVR3360/2020 | EPI_ISL_456790 | 2020-05-02 |
| Scotland/CVR3456/2020 | EPI_ISL_456859 | 2020-05-10 |
| Scotland/EDB4553/2020 | EPI_ISL_461724 | 2020-05-06 |
| Scotland/EDB4559/2020 | EPI_ISL_461727 | 2020-05-06 |
| Senegal/003/2020 | EPI_ISL_418206 | 2020-02-28 |
| Senegal/026/2020 | EPI_ISL_418209 | 2020-03-03 |
| Senegal/136/2020 | EPI_ISL_418216 | 2020-03-13 |
| Senegal/620/2020 | EPI_ISL_420078 | 2020-03-20 |
| Serbia/CA3089-04/2020 | EPI_ISL_454795 | 2020-04-25 |
| Serbia/KV22-05/2020 | EPI_ISL_462435 | 2020-05-10 |
| Serbia/KV26-04/2020 | EPI_ISL_437435 | 2020-04-04 |
| Serbia/KV27-04/2020 | EPI_ISL_462437 | 2020-04-23 |
| Serbia/NS838-04/2020 | EPI_ISL_462434 | 2020-04-01 |
| Shanghai/SH0005/2020 | EPI_ISL_416319 | 2020-01-28 |
| Shanghai/SH0109/2020 | EPI_ISL_416398 | 2020-02-02 |
| Shanghai/SH0127/2020 | EPI_ISL_416408 | 2020-02-12 |
| Sichuan/SC-NC-075/2020 | EPI_ISL_451334 | 2020-01-30 |
| Singapore/1/2020 | EPI_ISL_406973 | 2020-01-23 |
| Singapore/10/2020 | EPI_ISL_410716 | 2020-02-04 |
| Singapore/109/2020 | EPI_ISL_443201 | 2020-03-05 |
| Singapore/12/2020 | EPI_ISL_414378 | 2020-02-17 |
| Singapore/138/2020 | EPI_ISL_443230 | 2020-03-17 |
| Singapore/169/2020 | EPI_ISL_462287 | 2020-03-14 |
| Singapore/17/2020 | EPI_ISL_418992 | 2020-02-10 |
| Singapore/186/2020 | EPI_ISL_462304 | 2020-02-08 |
| Singapore/187/2020 | EPI_ISL_462305 | 2020-02-27 |
| Singapore/20/2020 | EPI_ISL_418993 | 2020-01-29 |
| Singapore/21/2020 | EPI_ISL_419000 | 2020-02-13 |
| Singapore/254/2020 | EPI_ISL_462372 | 2020-05-15 |
| Singapore/275/2020 | EPI_ISL_462393 | 2020-05-06 |
| Singapore/282/2020 | EPI_ISL_462400 | 2020-04-09 |
| Singapore/294/2020 | EPI_ISL_462412 | 2020-05-03 |
| Singapore/3Clin/2020 | EPI_ISL_418994 | 2020-01-29 |
| Singapore/44/2020 | EPI_ISL_428823 | 2020-03-08 |
| Singapore/5/2020 | EPI_ISL_410536 | 2020-02-06 |
| Singapore/54/2020 | EPI_ISL_428833 | 2020-04-08 |
| Singapore/8/2020 | EPI_ISL_410714 | 2020-02-03 |
| Singapore/88/2020 | EPI_ISL_435693 | 2020-04-21 |
| Slovakia/SK-BMC5/2020 | EPI_ISL_417879 | 2020-03-06 |
| Slovenia/12304/2020 | EPI_ISL_420295 | 2020-03-24 |
| Slovenia/4584/2020 | EPI_ISL_420294 | 2020-03-06 |
| Slovenia/808/2020 | EPI_ISL_420541 | 2020-03-05 |
| Slovenia/MB0329/2020 | EPI_ISL_426379 | 2020-03-29 |
| Slovenia/MB0419/2020 | EPI_ISL_449799 | 2020-04-19 |
| SouthAfrica/KRISP-010/2020 | EPI_ISL_436685 | 2020-04-01 |
| SouthAfrica/KRISP-012/2020 | EPI_ISL_421576 | 2020-04-01 |
| SouthAfrica/KRISP-07/2020 | EPI_ISL_421574 | 2020-04-01 |
| SouthAfrica/KRISP-103/2020 | EPI_ISL_455633 | 2020-04-30 |
| SouthAfrica/KRISP-104/2020 | EPI_ISL_455634 | 2020-05-01 |
| SouthAfrica/KRISP-105/2020 | EPI_ISL_455635 | 2020-05-05 |
| SouthAfrica/KRISP-106/2020 | EPI_ISL_455636 | 2020-03-31 |
| SouthAfrica/KRISP-107/2020 | EPI_ISL_455637 | 2020-05-04 |
| SouthAfrica/KRISP-108/2020 | EPI_ISL_455638 | 2020-05-04 |
| SouthAfrica/KRISP-109/2020 | EPI_ISL_455639 | 2020-03-31 |
| SouthAfrica/R05929/2020 | EPI_ISL_450495 | 2020-03-25 |
| SouthAfrica/R07552/2020 | EPI_ISL_450299 | 2020-03-31 |
| SouthAfrica/R07719/2020 | EPI_ISL_450301 | 2020-04-01 |
| SouthKorea/KCDC06/2020 | EPI_ISL_412870 | 2020-01-30 |
| SouthKorea/KCDC07/2020 | EPI_ISL_412871 | 2020-01-31 |
| SouthKorea/KUMC01/2020 | EPI_ISL_413017 | 2020-02-06 |
| Spain/Almenara657/2020 | EPI_ISL_455723 | 2020-03-31 |
| Spain/COV000786/2020 | EPI_ISL_452723 | 2020-03-09 |
| Spain/COV000860/2020 | EPI_ISL_452692 | 2020-02-29 |
| Spain/COV001056/2020 | EPI_ISL_452616 | 2020-04-01 |
| Spain/COV001321/2020 | EPI_ISL_452552 | 2020-03-23 |
| Spain/COV001425/2020 | EPI_ISL_452476 | 2020-03-23 |
| Spain/Madrid_LP15_4/2020 | EPI_ISL_417978 | 2020-03-09 |
| Spain/Valencia145/2020 | EPI_ISL_436240 | 2020-03-18 |
| Spain/Valencia183/2020 | EPI_ISL_436278 | 2020-03-24 |
| Spain/Valencia266/2020 | EPI_ISL_436361 | 2020-02-29 |
| Spain/Valencia98/2020 | EPI_ISL_425222 | 2020-03-17 |
| SriLanka/COV38/2020 | EPI_ISL_428670 | 2020-03-16 |
| SriLanka/COV486/2020 | EPI_ISL_428673 | 2020-03-31 |
| SriLanka/COV53/2020 | EPI_ISL_428671 | 2020-03-10 |
| Sweden/20-04631/2020 | EPI_ISL_430847 | 2020-02-27 |
| Sweden/20-07452/2020 | EPI_ISL_445233 | 2020-04-16 |
| Sweden/20-07856/2020 | EPI_ISL_452237 | 2020-04-23 |
| Sweden/20-50043/2020 | EPI_ISL_430860 | 2020-03-04 |
| Sweden/20-50181/2020 | EPI_ISL_429154 | 2020-03-08 |
| Sweden/20-50224/2020 | EPI_ISL_454892 | 2020-03-07 |
| Sweden/20-50231/2020 | EPI_ISL_430863 | 2020-03-09 |
| Sweden/20-50259/2020 | EPI_ISL_455897 | 2020-03-07 |
| Sweden/20-50274/2020 | EPI_ISL_455906 | 2020-03-08 |
| Sweden/20-50360/2020 | EPI_ISL_430864 | 2020-03-16 |
| Sweden/20-51167/2020 | EPI_ISL_450832 | 2020-05-04 |
| Sweden/20-51264/2020 | EPI_ISL_455104 | 2020-05-06 |
| Sweden/20-51317/2020 | EPI_ISL_455105 | 2020-05-07 |
| Sweden/20-51387/2020 | EPI_ISL_455107 | 2020-05-12 |
| Sweden/20-51426/2020 | EPI_ISL_455109 | 2020-05-13 |
| Switzerland/100817/2020 | EPI_ISL_451767 | 2020-03-26 |
| Switzerland/101175/2020 | EPI_ISL_451838 | 2020-03-31 |
| Switzerland/101177/2020 | EPI_ISL_451839 | 2020-03-31 |
| Switzerland/110469/2020 | EPI_ISL_451887 | 2020-04-06 |
| Switzerland/110491/2020 | EPI_ISL_451902 | 2020-04-07 |
| Switzerland/42169171/2020 | EPI_ISL_418271 | 2020-02-27 |
| Switzerland/42169310/2020 | EPI_ISL_418275 | 2020-02-27 |
| Switzerland/42176753/2020 | EPI_ISL_418284 | 2020-03-04 |
| Switzerland/GE0199/2020 | EPI_ISL_415455 | 2020-02-28 |
| Switzerland/GE1422/2020 | EPI_ISL_415454 | 2020-02-28 |
| Switzerland/GE2453/2020 | EPI_ISL_429219 | 2020-04-03 |
| Switzerland/GE5007/2020 | EPI_ISL_429206 | 2020-04-07 |
| Switzerland/GE9586/2020 | EPI_ISL_414022 | 2020-02-27 |
| Switzerland/GR2988/2020 | EPI_ISL_415698 | 2020-02-27 |
| Switzerland/GR3043/2020 | EPI_ISL_415699 | 2020-02-27 |
| Taiwan/107/2020 | EPI_ISL_420085 | 2020-03-20 |
| Taiwan/2/2020 | EPI_ISL_406031 | 2020-01-23 |
| Taiwan/3/2020 | EPI_ISL_411926 | 2020-01-24 |
| Taiwan/4/2020 | EPI_ISL_411927 | 2020-01-28 |
| Taiwan/5/2020 | EPI_ISL_428489 | 2020-01-31 |
| Taiwan/8/2020 | EPI_ISL_428488 | 2020-01-31 |
| Taiwan/CGMH-CGU-05/2020 | EPI_ISL_415743 | 2020-02-27 |
| Taiwan/CGMH-CGU-07/2020 | EPI_ISL_417520 | 2020-03-09 |
| Taiwan/CGMH-CGU-26/2020 | EPI_ISL_452178 | 2020-04-19 |
| Taiwan/CGMH-CGU-27/2020 | EPI_ISL_452179 | 2020-04-19 |
| Taiwan/NTU01/2020 | EPI_ISL_408489 | 2020-01-31 |
| Taiwan/NTU27/2020 | EPI_ISL_447621 | 2020-04-13 |
| Taiwan/NTU28/2020 | EPI_ISL_447622 | 2020-04-27 |
| Taiwan/TSGH-12/2020 | EPI_ISL_428229 | 2020-03-18 |
| Taiwan/TSGH-23/2020 | EPI_ISL_436108 | 2020-04-02 |
| Taiwan/TSGH-26/2020 | EPI_ISL_447252 | 2020-02-25 |
| Taiwan/TSGH-35/2020 | EPI_ISL_457726 | 2020-02-06 |
| Taiwan/TSGH-36/2020 | EPI_ISL_457730 | 2020-02-06 |
| Thailand/Bangkok_1716/2020 | EPI_ISL_447920 | 2020-02-25 |
| Thailand/Bangkok_269/2020 | EPI_ISL_447915 | 2020-01-26 |
| Thailand/Bangkok_580/2020 | EPI_ISL_447918 | 2020-02-01 |
| Thailand/Bangkok-0044/2020 | EPI_ISL_429180 | 2020-03-28 |
| Thailand/Bangkok-0079/2020 | EPI_ISL_447020 | 2020-04-01 |
| Thailand/Bangkok-0080/2020 | EPI_ISL_447021 | 2020-04-01 |
| Thailand/Bangkok-0085/2020 | EPI_ISL_447026 | 2020-04-03 |
| Thailand/Bangkok-0087/2020 | EPI_ISL_447027 | 2020-04-06 |
| Thailand/Bangkok-0089/2020 | EPI_ISL_447029 | 2020-04-07 |
| Thailand/Bangkok-CONI-0097/2020 | EPI_ISL_458026 | 2020-04-02 |
| Thailand/NIH-2472/2020 | EPI_ISL_434701 | 2020-03-14 |
| Thailand/Nonthaburi_68/2020 | EPI_ISL_447910 | 2020-01-15 |
| Thailand/SI200893-NT/2020 | EPI_ISL_437624 | 2020-02-01 |
| Thailand/SI201712-NT/2020 | EPI_ISL_437617 | 2020-02-03 |
| Thailand/SI202205-NT/2020 | EPI_ISL_437616 | 2020-02-07 |
| Thailand/SI202620-NT/2020 | EPI_ISL_437615 | 2020-02-22 |
| Thailand/SI202769-NT/2020 | EPI_ISL_437614 | 2020-02-25 |
| Thailand/SI202872-NT/2020 | EPI_ISL_437613 | 2020-02-25 |
| tiger/USA/NY-040420/2020 | EPI_ISL_420293 | 2020-04-02 |
| Timor-Leste/TL05/2020 | EPI_ISL_456597 | 2020-04-11 |
| Timor-Leste/TL16/2020 | EPI_ISL_456604 | 2020-04-12 |
| Timor-Leste/TL20/2020 | EPI_ISL_456599 | 2020-04-13 |
| Timor-Leste/TL25/2020 | EPI_ISL_456600 | 2020-03-30 |
| Tunisia/MHT_1/2020 | EPI_ISL_458285 | 2020-03-21 |
| Tunisia/MHT_2/2020 | EPI_ISL_458286 | 2020-03-24 |
| Turkey/GLAB-CoV008/2020 | EPI_ISL_427391 | 2020-04-13 |
| Turkey/GLAB-CoV012/2020 | EPI_ISL_428346 | 2020-04-17 |
| Turkey/GLAB-CoV013/2020 | EPI_ISL_428368 | 2020-04-16 |
| Turkey/HSGM-1009/2020 | EPI_ISL_437322 | 2020-03-19 |
| Turkey/HSGM-11640/2020 | EPI_ISL_437333 | 2020-03-25 |
| Turkey/HSGM-1468/2020 | EPI_ISL_437312 | 2020-03-25 |
| Turkey/HSGM-5624/2020 | EPI_ISL_428715 | 2020-03-18 |
| Turkey/HSGM-8001/2020 | EPI_ISL_428720 | 2020-03-21 |
| Turkey/IMU-SP-01/2020 | EPI_ISL_460618 | 2020-04-15 |
| Turkey/IMU-SP-02/2020 | EPI_ISL_460617 | 2020-04-16 |
| Turkey/IMU-SP-04/2020 | EPI_ISL_460619 | 2020-04-16 |
| Turkey/Istanbul-BezmCoV1/2020 | EPI_ISL_457824 | 2020-03-24 |
| Turkey/VETAL1902_2/2020 | EPI_ISL_455719 | 2020-04-09 |
| Uganda/UG001/2020 | EPI_ISL_451183 | 2020-03-25 |
| Uganda/UG003/2020 | EPI_ISL_451185 | 2020-03-27 |
| Uganda/UG006/2020 | EPI_ISL_451188 | 2020-03-30 |
| Uganda/UG015/2020 | EPI_ISL_451197 | 2020-04-27 |
| Uganda/UG016/2020 | EPI_ISL_451198 | 2020-04-27 |
| Uganda/UG017/2020 | EPI_ISL_451199 | 2020-04-20 |
| Uganda/UG019/2020 | EPI_ISL_451201 | 2020-04-30 |
| Uganda/UG020/2020 | EPI_ISL_451202 | 2020-05-01 |
| UnitedArabEmirates/L0879/2020 | EPI_ISL_435124 | 2020-03-16 |
| UnitedArabEmirates/L1758/2020 | EPI_ISL_435129 | 2020-03-10 |
| UnitedArabEmirates/L2409/2020 | EPI_ISL_435131 | 2020-02-25 |
| UnitedArabEmirates/L3779/2020 | EPI_ISL_435132 | 2020-03-15 |
| UnitedArabEmirates/L4184/2020 | EPI_ISL_435133 | 2020-03-10 |
| UnitedArabEmirates/L4280/2020 | EPI_ISL_435134 | 2020-02-08 |
| UnitedArabEmirates/L4682/2020 | EPI_ISL_435135 | 2020-02-25 |
| UnitedArabEmirates/L5630/2020 | EPI_ISL_435137 | 2020-01-29 |
| UnitedArabEmirates/L7356/2020 | EPI_ISL_435140 | 2020-03-12 |
| UnitedArabEmirates/L9766/2020 | EPI_ISL_435142 | 2020-03-14 |
| Uruguay/UY-1/2020 | EPI_ISL_426476 | 2020-03-16 |
| Uruguay/UY-4/2020 | EPI_ISL_426479 | 2020-03-17 |
| Uruguay/UY-NYUMC846/2020 | EPI_ISL_457942 | 2020-03-17 |
| Uruguay/UY-NYUMC858/2020 | EPI_ISL_457954 | 2020-03-23 |
| Uruguay/UY-NYUMC862/2020 | EPI_ISL_457958 | 2020-03-25 |
| Uruguay/UY-NYUMC864/2020 | EPI_ISL_457960 | 2020-03-28 |
| Uruguay/UY-NYUMC866/2020 | EPI_ISL_457962 | 2020-03-30 |
| Uruguay/UY-NYUMC868/2020 | EPI_ISL_457964 | 2020-04-01 |
| Uruguay/UY-NYUMC869/2020 | EPI_ISL_457965 | 2020-04-03 |
| Uruguay/UY-NYUMC871/2020 | EPI_ISL_457967 | 2020-04-09 |
| Uruguay/UY-NYUMC872/2020 | EPI_ISL_457968 | 2020-04-11 |
| Uruguay/UY-NYUMC873/2020 | EPI_ISL_457969 | 2020-04-14 |
| Uruguay/UY-NYUMC874/2020 | EPI_ISL_457970 | 2020-04-14 |
| Uruguay/UY-NYUMC875/2020 | EPI_ISL_457971 | 2020-04-19 |
| Uruguay/UY-NYUMC876/2020 | EPI_ISL_457972 | 2020-04-21 |
| Uruguay/UY-NYUMC877/2020 | EPI_ISL_457973 | 2020-04-22 |
| USA/CA-CZB-1045/2020 | EPI_ISL_437045 | 2020-04-04 |
| USA/CA-SCCPHD-UC105/2020 | EPI_ISL_435584 | 2020-02-29 |
| USA/CA2/2020 | EPI_ISL_406036 | 2020-01-22 |
| USA/CA3/2020 | EPI_ISL_408008 | 2020-01-29 |
| USA/CA4/2020 | EPI_ISL_408009 | 2020-01-29 |
| USA/CT-UW-5749/2020 | EPI_ISL_430917 | 2020-04-04 |
| USA/CT-Yale-102/2020 | EPI_ISL_431081 | 2020-04-06 |
| USA/IA-GMF-M00005/2020 | EPI_ISL_455582 | 2020-05-26 |
| USA/IL2/2020 | EPI_ISL_410045 | 2020-01-28 |
| USA/LA-BIE-054/2020 | EPI_ISL_455610 | 2020-04-07 |
| USA/LA-SR0270/2020 | EPI_ISL_445125 | 2020-04-01 |
| USA/MA1/2020 | EPI_ISL_409067 | 2020-01-29 |
| USA/MI-MDHHS-SC20520/2020 | EPI_ISL_460568 | 2020-05-07 |
| USA/MI-MDHHS-SC20615/2020 | EPI_ISL_462697 | 2020-04-29 |
| USA/MN68-MDH68/2020 | EPI_ISL_419396 | 2020-03-14 |
| USA/NY-NYUMC684/2020 | EPI_ISL_450401 | 2020-04-01 |
| USA/NY-WCMP11H06P/2020 | EPI_ISL_427598 | 2020-03-16 |
| USA/RI_0520/2020 | EPI_ISL_419553 | 2020-02-28 |
| USA/UT-0510/2020 | EPI_ISL_430057 | 2020-04-03 |
| USA/VA-DCLS-0095/2020 | EPI_ISL_434590 | 2020-04-09 |
| USA/WA-S123/2020 | EPI_ISL_430160 | 2020-02-29 |
| USA/WA-S3/2020 | EPI_ISL_413560 | 2020-02-28 |
| USA/WA-S30/2020 | EPI_ISL_417083 | 2020-02-28 |
| USA/WA-S42/2020 | EPI_ISL_417095 | 2020-02-28 |
| USA/WA-S618/2020 | EPI_ISL_438171 | 2020-04-26 |
| USA/WA-S8/2020 | EPI_ISL_416463 | 2020-02-24 |
| USA/WA-UW-10090/2020 | EPI_ISL_461460 | 2020-05-29 |
| USA/WA-UW-2119/2020 | EPI_ISL_426091 | 2020-03-25 |
| USA/WA1/2020 | EPI_ISL_404895 | 2020-01-19 |
| USA/WI-GMF-00928/2020 | EPI_ISL_426161 | 2020-04-06 |
| USA/WI-UW-305/2020 | EPI_ISL_436599 | 2020-04-14 |
| USA/WI1/2020 | EPI_ISL_408670 | 2020-01-31 |
| Vietnam/19-01S/2020 | EPI_ISL_418269 | 2020-01-22 |
| Vietnam/38142/2020 | EPI_ISL_416427 | 2020-01-24 |
| Vietnam/39607/2020 | EPI_ISL_416428 | 2020-03-07 |
| Vietnam/CM99/2020 | EPI_ISL_416429 | 2020-02-11 |
| Vietnam/HCMC-35018/2020 | EPI_ISL_450742 | 2020-03-25 |
| Vietnam/HCMC-35020/2020 | EPI_ISL_450744 | 2020-03-25 |
| Vietnam/VNHN_1099/2020 | EPI_ISL_455695 | 2020-03-18 |
| Vietnam/VNHN_4189/2020 | EPI_ISL_455707 | 2020-04-02 |
| Vietnam/VNHN_4806/2020 | EPI_ISL_455711 | 2020-04-08 |
| Vietnam/VNHN_4864/2020 | EPI_ISL_455708 | 2020-04-10 |
| Vietnam/VNHN_4868/2020 | EPI_ISL_455710 | 2020-04-09 |
| Vietnam/VNHN_4875/2020 | EPI_ISL_455712 | 2020-04-10 |
| Vietnam/VNHN_4958/2020 | EPI_ISL_455718 | 2020-04-10 |
| Vietnam/VR03-38142/2020 | EPI_ISL_408668 | 2020-01-24 |
| Wales/PHWC-2523C/2020 | EPI_ISL_420977 | 2020-03-22 |
| Wales/PHWC-26F9E/2020 | EPI_ISL_422054 | 2020-03-29 |
| Wuhan/HB-WH1-126/2020 | EPI_ISL_454907 | 2020-03-02 |
| Wuhan/HB-WH1-132/2020 | EPI_ISL_455365 | 2020-02-23 |
| Wuhan/HB-WH3-181/2020 | EPI_ISL_454942 | 2020-03-02 |
| Wuhan/HB-WH4-194/2020 | EPI_ISL_454948 | 2020-03-24 |
| Wuhan/HB-WH5-227/2020 | EPI_ISL_454972 | 2020-03-17 |
| Wuhan/HB-WH6-246/2020 | EPI_ISL_454983 | 2020-03-12 |
| Wuhan/HB-WHCM-104/2020 | EPI_ISL_454989 | 2020-03-02 |
| Wuhan/HB-WHCM2-274/2020 | EPI_ISL_455008 | 2020-02-23 |
| Wuhan/HBCDC-HB-02/2019 | EPI_ISL_412898 | 2019-12-30 |
| Wuhan/Hu-1/2019 | EPI_ISL_402125 | 2019-12-26 |
| Wuhan/IPBCAMS-WH-01/2019 | EPI_ISL_402123 | 2019-12-24 |
| Wuhan/IPBCAMS-WH-03/2019 | EPI_ISL_403930 | 2019-12-30 |
| Wuhan/WH01/2019 | EPI_ISL_406798 | 2019-12-26 |
| Wuhan/WHUH001/2020 | EPI_ISL_449476 | 2020-01-22 |
| Wuhan/WIV04/2019 | EPI_ISL_402124 | 2019-12-30 |
| Wuhan/WIV05/2019 | EPI_ISL_402128 | 2019-12-30 |
| Wuhan/WIV06/2019 | EPI_ISL_402129 | 2019-12-30 |
| Zhejiang/OS5/2020 | EPI_ISL_455689 | 2020-03-24 |

**Table 6:** Characteristics and prevalence of non-synonymous, dominant de novo mutations.

For each mutation the effect on amino acid level and the position in the corresponding SARS-CoV-2 protein is indicated. The number of sequences and the count of different lineages (Pangolin nomenclature) deposited at GISAID (accession date 17th of August 2021) that contain the respective mutation is shown. For the CD8 T-cell epitopes that have been confirmed in this study the amino acid sequence is shown together with the corresponding range of nucleotide positions and the restricting HLA allele. Predicted binding affinities to MHC are indicated based on NetMHC version 4.0 (<http://www.cbs.dtu.dk/services/NetMHC/>).

MHC: major histocompatibility complex

HLA: human leukocyte antigen

del: deletion

nsp: non-structural protein

​​

| **Nucleotide polymorphism** | **Amino acid effect** | **protein codon** | **number of sequences** | **count of lineages** | **CD8 epitope** | **nucleotide positions of epitope** | **codon positions of epitope** | **HLA restriction** | **predicted affinity to MHC (nM)** |
| --- | --- | --- | --- | --- | --- | --- | --- | --- | --- |
| **3del21990** | **S:del144** | **S:del144** | **1055144** | **364** | **undefined** | **undefined** | **undefined** | **undefined** | **undefined** |
| **G23012A** | **S:E484K** | **S:E484K** | **168132** | **245** | **undefined** | **undefined** | **undefined** | **undefined** | **undefined** |
| **G22992A** | **S:S477N** | **S:S477N** | **66699** | **209** | **undefined** | **undefined** | **undefined** | **undefined** | **undefined** |
| **C10116T** | **ORF1a: T3284I** | **nsp5:T21I** | **6284** | **132** | **undefined** | **undefined** | **undefined** | **undefined** | **undefined** |
| **C12756T** | **ORF1a:T4164I** | **nsp9:T24I** | **3836** | **123** | **CTDDNALAYY** | **12752-12781** | **nsp9:23-32** | **A*01:01** | **39.7** |
| **A11451G** | **ORF1a:Q3729R** | **nsp6:Q160R** | **9602** | **58** | **undefined** | **undefined** | **undefined** | **undefined** | **undefined** |
| **G12566T** | **ORF1a: V4101F** | **nsp8:V159F** | **333** | **40** | **ALWEIQQVV** | **12545-12571** | **nsp8:151-160** | **A*02:01** | **7.8** |
| **C29268T** | **N:T332I** | **N:T332I** | **273** | **30** | **TPSGTWLTY** | **29246-29272** | **N:332-340** | **B*35:01** | **4.7** |
| **A9741G** | **ORF1a:N3159S** | **nsp4:N396S** | **58** | **22** | **undefined** | **undefined** | **undefined** | **undefined** | **undefined** |
| **T27793C** | **ORF7b:F13S** | **ORF7b:F13S** | **83** | **16** | **undefined** | **undefined** | **undefined** | **undefined** | **undefined** |
| **A4241G** | **ORF1a:I1326V** | **nsp3:I508V** | **99** | **15** | **undefined** | **undefined** | **undefined** | **undefined** | **undefined** |
| **C29247A** | **N:T325K** | **N:T325K** | **20** | **8** | **TPSGTWLTY** | **29246-29272** | **N:332-340** | **B*35:01** | **4.7** |
